# Supplementary material for: PRSice-2: Polygenic Risk Score software for biobank-scale data
Source: PubMed Central journal article supplement (PMC6629542; doi:10.1093/gigascience/giz082), 2019-07-15
Supplement: giz082_giga-d-18-00468_original_submission.pdf [file giz082_giga-d-18-00468_original_submission.pdf]

|                                                                               |                                                                                                                                                                                                                                                                                                                                                                                                                                                                                                                                                                                                                                                                                                                                                                                                                                                                                                                                                                                                                                                                                                                                                                                                                                                                                                                                                                                                                                                                                                                                                                              |                                         |
|-------------------------------------------------------------------------------|------------------------------------------------------------------------------------------------------------------------------------------------------------------------------------------------------------------------------------------------------------------------------------------------------------------------------------------------------------------------------------------------------------------------------------------------------------------------------------------------------------------------------------------------------------------------------------------------------------------------------------------------------------------------------------------------------------------------------------------------------------------------------------------------------------------------------------------------------------------------------------------------------------------------------------------------------------------------------------------------------------------------------------------------------------------------------------------------------------------------------------------------------------------------------------------------------------------------------------------------------------------------------------------------------------------------------------------------------------------------------------------------------------------------------------------------------------------------------------------------------------------------------------------------------------------------------|-----------------------------------------|
| <b>Manuscript Number:</b>                                                     | GIGA-D-18-00468                                                                                                                                                                                                                                                                                                                                                                                                                                                                                                                                                                                                                                                                                                                                                                                                                                                                                                                                                                                                                                                                                                                                                                                                                                                                                                                                                                                                                                                                                                                                                              |                                         |
| <b>Full Title:</b>                                                            | PRSize-2: Next Generation Polygenic Risk Score Analysis Software                                                                                                                                                                                                                                                                                                                                                                                                                                                                                                                                                                                                                                                                                                                                                                                                                                                                                                                                                                                                                                                                                                                                                                                                                                                                                                                                                                                                                                                                                                             |                                         |
| <b>Article Type:</b>                                                          | Technical Note                                                                                                                                                                                                                                                                                                                                                                                                                                                                                                                                                                                                                                                                                                                                                                                                                                                                                                                                                                                                                                                                                                                                                                                                                                                                                                                                                                                                                                                                                                                                                               |                                         |
| <b>Funding Information:</b>                                                   | UK Medical Research Council<br>(MR/N015746/1)                                                                                                                                                                                                                                                                                                                                                                                                                                                                                                                                                                                                                                                                                                                                                                                                                                                                                                                                                                                                                                                                                                                                                                                                                                                                                                                                                                                                                                                                                                                                | Dr Shing Wan Choi<br>Dr Paul F O'Reilly |
| <b>Abstract:</b>                                                              | <p><b>Background</b></p> <p>Polygenic Risk Score (PRS) analyses have become an integral part of biomedical research, exploited to gain insights into shared aetiology among traits, to control for genomic profile in experimental studies, and to strengthen causal inference, among a range of applications. Substantial efforts are now devoted to biobank projects to collect large genetic and phenotypic data, providing unprecedented opportunity for genetic discovery and applications. To process the large-scale data provided by such biobank resources, highly efficient and scalable methods and software are required.</p> <p><b>Method</b></p> <p>Here we introduce PRSize-2, an efficient and scalable software for automating and simplifying polygenic risk score analyses on large-scale data. PRSize-2 handles both genotyped and imputed data, provides empirical association P-values free from overfitting effects, supports different inheritance models and can evaluate multiple continuous and binary target traits simultaneously. We demonstrate that PRSize-2 is significantly faster than alternative polygenic score software, LDpred and lassosum, which will be increasingly important as data sizes grow and as the applications of PRS become more sophisticated, e.g. when incorporated into high-dimensional or gene-set based analyses.</p> <p><b>Conclusion</b></p> <p>PRSize-2 is written in C++, with an R script for plotting, and is freely available for download from <a href="http://PRSize.info">http://PRSize.info</a></p> |                                         |
| <b>Corresponding Author:</b>                                                  | Shing Wan Choi<br>King's College London<br>London, UNITED KINGDOM                                                                                                                                                                                                                                                                                                                                                                                                                                                                                                                                                                                                                                                                                                                                                                                                                                                                                                                                                                                                                                                                                                                                                                                                                                                                                                                                                                                                                                                                                                            |                                         |
| <b>Corresponding Author Secondary Information:</b>                            |                                                                                                                                                                                                                                                                                                                                                                                                                                                                                                                                                                                                                                                                                                                                                                                                                                                                                                                                                                                                                                                                                                                                                                                                                                                                                                                                                                                                                                                                                                                                                                              |                                         |
| <b>Corresponding Author's Institution:</b>                                    | King's College London                                                                                                                                                                                                                                                                                                                                                                                                                                                                                                                                                                                                                                                                                                                                                                                                                                                                                                                                                                                                                                                                                                                                                                                                                                                                                                                                                                                                                                                                                                                                                        |                                         |
| <b>Corresponding Author's Secondary Institution:</b>                          |                                                                                                                                                                                                                                                                                                                                                                                                                                                                                                                                                                                                                                                                                                                                                                                                                                                                                                                                                                                                                                                                                                                                                                                                                                                                                                                                                                                                                                                                                                                                                                              |                                         |
| <b>First Author:</b>                                                          | Shing Wan Choi                                                                                                                                                                                                                                                                                                                                                                                                                                                                                                                                                                                                                                                                                                                                                                                                                                                                                                                                                                                                                                                                                                                                                                                                                                                                                                                                                                                                                                                                                                                                                               |                                         |
| <b>First Author Secondary Information:</b>                                    |                                                                                                                                                                                                                                                                                                                                                                                                                                                                                                                                                                                                                                                                                                                                                                                                                                                                                                                                                                                                                                                                                                                                                                                                                                                                                                                                                                                                                                                                                                                                                                              |                                         |
| <b>Order of Authors:</b>                                                      | Shing Wan Choi<br>Paul F O'Reilly                                                                                                                                                                                                                                                                                                                                                                                                                                                                                                                                                                                                                                                                                                                                                                                                                                                                                                                                                                                                                                                                                                                                                                                                                                                                                                                                                                                                                                                                                                                                            |                                         |
| <b>Order of Authors Secondary Information:</b>                                |                                                                                                                                                                                                                                                                                                                                                                                                                                                                                                                                                                                                                                                                                                                                                                                                                                                                                                                                                                                                                                                                                                                                                                                                                                                                                                                                                                                                                                                                                                                                                                              |                                         |
| <b>Additional Information:</b>                                                |                                                                                                                                                                                                                                                                                                                                                                                                                                                                                                                                                                                                                                                                                                                                                                                                                                                                                                                                                                                                                                                                                                                                                                                                                                                                                                                                                                                                                                                                                                                                                                              |                                         |
| <b>Question</b>                                                               | <b>Response</b>                                                                                                                                                                                                                                                                                                                                                                                                                                                                                                                                                                                                                                                                                                                                                                                                                                                                                                                                                                                                                                                                                                                                                                                                                                                                                                                                                                                                                                                                                                                                                              |                                         |
| Are you submitting this manuscript to a special series or article collection? | No                                                                                                                                                                                                                                                                                                                                                                                                                                                                                                                                                                                                                                                                                                                                                                                                                                                                                                                                                                                                                                                                                                                                                                                                                                                                                                                                                                                                                                                                                                                                                                           |                                         |

|                                                                                                                                                                                                                                                                                                                                                                                                                                                                                                                                                         |            |
|---------------------------------------------------------------------------------------------------------------------------------------------------------------------------------------------------------------------------------------------------------------------------------------------------------------------------------------------------------------------------------------------------------------------------------------------------------------------------------------------------------------------------------------------------------|------------|
| <p><b>Experimental design and statistics</b></p> <p>Full details of the experimental design and statistical methods used should be given in the Methods section, as detailed in our <a href="#">Minimum Standards Reporting Checklist</a>. Information essential to interpreting the data presented should be made available in the figure legends.</p> <p>Have you included all the information requested in your manuscript?</p>                                                                                                                      | <p>Yes</p> |
| <p><b>Resources</b></p> <p>A description of all resources used, including antibodies, cell lines, animals and software tools, with enough information to allow them to be uniquely identified, should be included in the Methods section. Authors are strongly encouraged to cite <a href="#">Research Resource Identifiers</a> (RRIDs) for antibodies, model organisms and tools, where possible.</p> <p>Have you included the information requested as detailed in our <a href="#">Minimum Standards Reporting Checklist</a>?</p>                     | <p>Yes</p> |
| <p><b>Availability of data and materials</b></p> <p>All datasets and code on which the conclusions of the paper rely must be either included in your submission or deposited in <a href="#">publicly available repositories</a> (where available and ethically appropriate), referencing such data using a unique identifier in the references and in the “Availability of Data and Materials” section of your manuscript.</p> <p>Have you have met the above requirement as detailed in our <a href="#">Minimum Standards Reporting Checklist</a>?</p> | <p>Yes</p> |

# 1 PRSize-2: Next Generation Polygenic Risk 2 Score Analysis Software

3 Shing Wan Choi\* and Paul O'Reilly

4 *MRC Social, Genetic and Developmental Psychiatry Centre, Institute of Psychiatry,*  
5 *Psychology and Neuroscience, King's College London, London, United Kingdom*

6 *\*To whom correspondence should be addressed.*

## 7 **Abstract**

8 **Background:** Polygenic Risk Score (PRS) analyses have become an integral part of biomedical  
9 research, exploited to gain insights into shared aetiology among traits, to control for genomic  
10 profile in experimental studies, and to strengthen causal inference, among a range of applications.  
11 Substantial efforts are now devoted to biobank projects to collect large genetic and phenotypic  
12 data, providing unprecedented opportunity for genetic discovery and applications. To process the  
13 large-scale data provided by such biobank resources, highly efficient and scalable methods and  
14 software are required.

15 **Method:** Here we introduce PRSize-2, an efficient and scalable software for automating and  
16 simplifying polygenic risk score analyses on large-scale data. PRSize-2 handles both genotyped  
17 and imputed data, provides empirical association  $P$ -values free from overfitting effects, supports  
18 different inheritance models and can evaluate multiple continuous and binary target traits  
19 simultaneously. We demonstrate that PRSize-2 is significantly faster than alternative polygenic

1  
2  
3  
4  
5  
6  
7  
8  
9  
10  
11  
12  
13  
14  
15  
16  
17  
18  
19  
20  
21  
22  
23  
24  
25  
26  
27  
28  
29  
30  
31  
32  
33  
34  
35  
36  
37  
38  
39  
40  
41  
42  
43  
44  
45  
46  
47  
48  
49  
50  
51  
52  
53  
54  
55  
56  
57  
58  
59  
60  
61  
62  
63  
64  
65

score software, LDpred and lassosum, which will be increasingly important as data sizes grow and as the applications of PRS become more sophisticated, eg. when incorporated into high-dimensional or gene-set based analyses.

**Conclusion:** PRSice-2 is written in C++, with an R script for plotting, and is freely available for download from <http://PRSice.info>

**Keywords:** Polygenic Risk Score, GWAS, Imputation

Polygenic Risk Score (PRS) analyses are beginning to play a critical role in biomedical research, proving to have both scientific and clinical utility [1–9]. The increasing availability of genetic data from regional and national biobank projects [10–12] have allowed more powerful PRS to be calculated. However, the calculation of PRS, which involves parameter optimization [13–16], can be a computationally intensive process, especially for large datasets and when multiple analyses are conducted. To fully utilize the power of large datasets and to facilitate future method and application developments, at scale, we have performed a major overhaul of our original PRSice software [13], to produce PRSice-2. All code has been re-written in C++ and code from PLINK-1.9 [17] that minimised computation has been incorporated. As a result of the consistent language and switch to objected-oriented code, different analytical components of the code can communicate directly, without, for example, the generation of intermediate files, such as those containing PRS corresponding to each *P*-value threshold, or post-processed genotype files. This has generated a substantial speed-up and reduction in disk space requirement in PRSice-2. In addition, a separate plotting script was implemented in R. Separate tasks are organized into functions and are, thus, more amenable to tailored extensions by users. Finally, a range of user-options were incorporated into PRSice-2 to increase flexibility and improve usability.

## 42 Features of PRSice-2

43 PRSice-2 retains the majority of the features of its predecessor PRSice [13], including automatic  
44 strand flipping, single nucleotide polymorphism (SNP) thinning according to linkage  
45 disequilibrium (LD) and  $P$ -value, known as clumping [18], and calculation and evaluation of PRS  
46 under few ('fastscore') or many ('high-resolution scoring')  $P$ -value thresholds.

47 When compared to PRSice, PRSice-2 streamlines the entire PRS analysis pipeline without  
48 generating intermediate files, and performs all the main computations in C++, leading to a drastic  
49 speed-up in runtime and reduction of storage space. Extraction and exclusion of samples and SNPs  
50 are also implemented, allowing PRS analysis to be performed directly on a subset of the input data  
51 without performing pre-filtering.

52 Briefly, the main new features of PRSice-2 are:

- 53 1. Handles large-scale PRS analyses of both genotyped and imputed data.
- 54 2. Computes empirical association  $P$ -values to account for over-fitting.
- 55 3. Can perform PRS analyses on extensive number of target phenotypes simultaneously.
- 56 4. Provides several options for imputing missing genotypes.
- 57 5. Allows calculation of PRS based on different inheritance models, including additive,  
58 dominant, recessive and heterozygous models.
- 59 6. Automatically generates dummy variables for categorical covariates.
- 60 7. Can perform regression to estimate relative effect/risk corresponding to samples in user-  
61 defined stratum of the population. Can output quantile and strata plots.
- 62 8. Amenable to user extensions, such as relating to input data format, regression modelling  
63 and output.

## 64 Handling of Imputed data

65 Genotypes are typically represented as the discrete counts of the minor or effect allele (0, 1 or 2),  
66 for single nucleotide polymorphisms (SNPs), in each individual. Genotypes not included in the  
67 genotyping chip can, potentially, be imputed and are usually either recorded as a set of three  
68 probabilities corresponding to the probability of each of the possible genotypes [19], or based on  
69 these, as the expected genotype (a real number between 0 and 2 known as the “dosage”) [19] or as  
70 the “best guess” (most probable) genotype. While any of these data formats can be exploited in  
71 PRS analyses, the most common approach is to use the “best-guess” genotype for each individual.  
72 However, this approach ignores the uncertainty in the imputed genotype.

73 Currently, most PRS software only support input of the genotyped format. Therefore, users need  
74 to generate a large intermediate file containing the best-guess genotypes and discard any  
75 information related to imputation uncertainty. To reduce the storage space requirement, and to  
76 incorporate imputation uncertainty into PRS analyses, PRSice-2 implements support for the BGEN  
77 imputation format. PRSice-2 can directly process the BGEN imputed format and either convert to  
78 best-guess genotypes or dosages when calculating the PRS, without generating a large intermediate  
79 file. While PRS based on best-guess genotypes are calculated as for genotyped input, dosage based  
80 PRS are calculated as

81

$$PRS = \left( \sum_i^m \beta_i \left( \sum_{j=0}^2 \omega_{ij} \times j \right) \right) \quad (1)$$

1  
2  
3  
4 82 where  $\omega_{ij}$  is the probability of observing genotype  $j$ , where  $j \in \{0,1,2\}$ , for the  $i^{th}$  SNP,  $m$  is the  
5  
6  
7 83 number of SNPs and  $\beta_i$  is the effect size of the  $i^{th}$  SNP estimated from the relevant base GWAS  
8  
9 84 data.

10  
11  
12 85 The ability to perform PRS analyses directly on imputed data can be particularly useful when the  
13  
14  
15 86 base GWAS and target samples are genotyped on a different platforms, as then there can be a small  
16  
17 87 fraction of overlapping SNPs. For example, of the 725,459 post-QC SNPs (see Supplementary  
18  
19  
20 88 Material) in the UK Biobank genotype data [10], only 31% (222,956) of those were found in the  
21  
22 89 GIANT Height and Body Mass Index (BMI) GWAS [20,21]. The use of imputed SNPs increases  
23  
24  
25 90 the number of overlapping SNPs to 2,121,036 SNPs. To assess the gain of power when using  
26  
27 91 imputed vs un-imputed data, we performed PRS analyses on Height and BMI using UK Biobank  
28  
29  
30 92 genotyped and imputed data, with GWAS summary statistics provided by the GIANT consortium  
31  
32 93 [20,21]. Age, UK Biobank genotyping batch, UK Biobank assessment centre and 40 principle  
33  
34  
35 94 components were first regressed out from the phenotype and the standardized residuals were used  
36  
37 95 instead. In the linear regression, performed by PRSice-2 in the UK Biobank data as target sample  
38  
39  
40 96 using the default parameters, with height as outcome and PRS for height as predictor, we observed  
41  
42 97 an increase in phenotypic variance explained ( $R^2$ ) by the PRS from 0.141 (genotyped) to 0.152  
43  
44 98 (dosage), and likewise for BMI of 0.0456 to 0.0535.

45  
46  
47 99 However, a challenge with imputed data is that there are numerous imputed formats in the field.  
48  
49  
50 100 While it is difficult to support all imputed formats, PRSice-2 adopts a modular approach, which  
51  
52 101 allows simple incorporation of supports for additional data formats (eg. vcf) in the future.  
53  
54

55 102

1  
2  
3  
4  
5  
6  
7  
8  
9  
10  
11  
12  
13  
14  
15  
16  
17  
18  
19  
20  
21  
22  
23  
24  
25  
26  
27  
28  
29  
30  
31  
32  
33  
34  
35  
36  
37  
38  
39  
40  
41  
42  
43  
44  
45  
46  
47  
48  
49  
50  
51  
52  
53  
54  
55  
56  
57  
58  
59  
60  
61  
62  
63  
64  
65

#### 103 Calculation of Empirical $P$ -value

104 All approaches to PRS calculation involve parameter optimisation in generating the final  
105 prediction model, and are thus vulnerable to overfitting [14]. The best strategy to avoid overfitting  
106 is to evaluate performance in an independent validation sample, but such a sample is not always  
107 available. Alternatively, if the primary aim is to assess evidence for an association to test a  
108 hypothesis, then we can calculate an empirical  $P$ -value corresponding to the association of the  
109 optimized PRS, with the Type 1 error rate controlled [13].

110 In PRSice-2, to obtain the empirical  $P$ -value, the target trait values are permuted across the sample  
111 of individuals  $k$  times (default = 10,000) and the PRS analysis repeated on each set of permuted  
112 phenotypes. Thus, on each permutation, the “best-fit PRS” is obtained as that most associated with  
113 the target trait across the range of  $P$ -value thresholds considered, and the empirical  $P$ -value is  
114 calculated as:

$$\text{empirical } P = \frac{\sum_{n=1}^N I(P_n < P_o) + 1}{N + 1} \quad (2)$$

115 where  $N$  is the number of permutations performed,  $I(\cdot)$  is the indicator function, which takes a  
116 value of 0 if the “best-fit PRS” of permutation  $n$  is smaller than the observed  $P$ -value,  $P_o$ , and  
117 where pseudo-counts of 1 are added to the numerator and denominator to avoid empirical  $P$ -values  
118 of 0 and reflecting (conservatively) counting the observed trait configuration as one potential null  
119 permutation [22]. While the empirical  $P$ -values for association will have controlled for the Type 1  
120 error rate, since the same process of parameter optimisation is performed explicitly under the null  
121 hypothesis, the observed phenotypic variance explained  $R^2$  remain unadjusted and affected by  
122 overfitting. Therefore, it is imperative to perform out-of-sample prediction, or cross-validation, to



1  
2  
3  
4  
5  
6  
7  
8  
9  
10  
11  
12  
13  
14  
15  
16  
17  
18  
19  
20  
21  
22  
23  
24  
25  
26  
27  
28  
29  
30  
31  
32  
33  
34  
35  
36  
37  
38  
39  
40  
41  
42  
43  
44  
45  
46  
47  
48  
49  
50  
51  
52  
53  
54  
55  
56  
57  
58  
59  
60  
61  
62  
63  
64  
65

123 evaluate the predictive power of PRS when using PRSice-2, and ideally the former given the  
124 problems of generalisability observed with PRS [14].

125

### 126 Analysis of PRS strata

127 While PRS on most complex traits presently have limited power to predict individual risk across  
128 the population, which will remain limited for low-moderate heritability traits irrespective of  
129 GWAS sample sizes, recent studies have demonstrated that individuals at the tails of PRS  
130 distribution have substantially higher disease risk compared to those of the general population.  
131 Thus, it could be more efficacious to employ a different risk management strategy, in terms of  
132 screening or interventions, for example, to individuals with extreme PRS [1–3].

133 We implemented the strata analysis feature in PRSice-2 to assist the calculation of relative  
134 phenotypic risk of individuals within different strata. Briefly, assuming there are  $N$  individuals,  
135 they will first be aggregated into  $M$  different strata based on their PRS. A  $M$  row by  $N - 1$  column  
136 design matrix were then generated using dummy coding, using a user defined stratum as the  
137 reference group (or the median stratum by default). A linear regression (for quantitative traits) or  
138 logistic regression (for binary traits) will then be performed to obtain the relative phenotypic risk  
139 of each stratum against the reference, represented by the beta-coefficient (or the odds ratio for  
140 binary outcome, which can then be visualized using the strata plot (Figure 1). This allow users to  
141 test whether individuals at the extreme stratum have a substantially higher phenotypic risk when  
142 compared to the reference stratum.

## Figure 1

Figure 1 Strata plot generated by PRSice-2. The X-axis shows the range of different quantiles (eg. (80,90] corresponds to those individuals with PRS between the 80%-ile – 90%-ile of the population), and the Y-axis shows the coefficient of regression when comparing PRS from different quantiles with the reference quantile (here, (40,60]).

### Benchmarking

PRSice-2 utilizes the standard approach to PRS calculation involving clumping SNPs and then performing the  $P$ -value thresholding strategy, known as the “C+T” method [14]. Studies [15,23] have shown that this approach has comparable predictive power to more complex methods such as lassosum [15] and LDpred [16]. As data size grows, or when more sophisticated PRS analyses are performed at scale [5,24], then computational efficiency becomes more important.

Here, we compared the runtime and memory usage of PRSice-2 versus lassosum [15] and LDpred [16]. We simulated a phenotype for each individual in the UK biobank based on genetic effect sizes drawn from a standard normal distribution plus error. 100, 1k, 10k and 100k samples were then randomly selected from the UK biobank and used as the target data. PRS analyses were then performed using lassosum (v0.4.1), LDpred (v0.9.1) and PRSice 2 (v2.1.4), on servers equipped with two 10 core Intel Haswell E5-2660 v3 @ 2.60GHz and 128GB of RAM. Default parameters of each program were used. Runtime and memory usage of each program were measured using the Linux *time* command. The entire process was repeated 5 times to obtain an estimated distribution of runtime and memory usage.

Our simulation results demonstrated that PRSice-2 is the most efficient software in all settings (Figure 2a) and that the memory usage scales well with the number of samples (Figure 2b). Specifically, PRSice-2 can complete the full PRS analysis on 100k samples within an average of 8 minutes (Supplementary Table 1), significantly faster than lassosum ( $P = 2.5e-6$ , two tailed  $t$ -

1  
2  
3  
4  
5  
6  
7  
8  
9  
10  
11  
12  
13  
14  
15  
16  
17  
18  
19  
20  
21  
22  
23  
24  
25  
26  
27  
28  
29  
30  
31  
32  
33  
34  
35  
36  
37  
38  
39  
40  
41  
42  
43  
44  
45  
46  
47  
48  
49  
50  
51  
52  
53  
54  
55  
56  
57  
58  
59  
60  
61  
62  
63  
64  
65

test), which takes an average 6 hours 13 minutes, and LDpred ( $P = 7.2e-5$ , two tailed t-test), which takes approximately 19 hours. Similarly, with 100k target samples, PRSice-2 requires less than 600MB of memory (Supplementary Table 2), which is significantly less than the 7.35 Gb required by lassosum ( $P = 9.6e-12$ , two tailed t-test) and the 51.2 Gb required by LDpred ( $P = 1.7e-34$ , two tailed t-test). With its quick runtime and low memory usage, PRSice-2 can perform PRS analyses at scale on a desktop computer.

|           |           |
|-----------|-----------|
| Figure 2a | Figure 2b |
|-----------|-----------|

Figure 2 Performance of the three PRS software. a) Average run time (in minutes) required to complete the whole analysis when different number of target samples were used. B) Average memory (in GB) required for the software to process different number of target samples.

## Discussion

We have introduced PRSice-2, a software for the automation of polygenic risk score (PRS) analyses in large-scale genetic-phenotype data. Our results demonstrates that PRSice-2 is the most efficient among the leading PRS software, outperforming lassosum [15] and LDpred [16]. As data sizes increase and more complicated PRS analyses, such as multi-trait or gene-set based PRS analyses, become common, the efficiency advantages of PRSice-2 will become increasingly important.

Over-fitting is a concern for all approaches to PRS analysis [14]. To control for the Type 1 error rate caused by over-fitting when exploiting PRS for hypothesis testing, PRSice-2 implements the calculation of empirical  $P$ -values.

1  
2  
3  
4  
5 185 **Availability and requirements**  
6

|    |                                                 |                                                     |
|----|-------------------------------------------------|-----------------------------------------------------|
| 7  |                                                 |                                                     |
| 8  | <b>Project Name</b>                             | PRsice-2                                            |
| 9  |                                                 |                                                     |
| 10 | <b>Project home page</b>                        | <a href="http://prsice.info">http://prsice.info</a> |
| 11 |                                                 |                                                     |
| 12 | <b>Operating systems</b>                        | Linux (64-bit)                                      |
| 13 |                                                 |                                                     |
| 14 | <b>(pre-compiled versions)</b>                  | OS X (64-bit Intel)                                 |
| 15 |                                                 | Windows (64-bit)                                    |
| 16 |                                                 |                                                     |
| 17 | <b>Programming language</b>                     | C++, R (version 3.2.3+)                             |
| 18 |                                                 |                                                     |
| 19 | <b>Other requirements</b>                       | GCC version 4.8+, zlib                              |
| 20 |                                                 |                                                     |
| 21 | <b>(when recompiling)</b>                       |                                                     |
| 22 |                                                 |                                                     |
| 23 | <b>License</b>                                  | GNU General Public License version 3.0              |
| 24 |                                                 | (GPLv3)                                             |
| 25 |                                                 |                                                     |
| 26 | <b>Any restrictions to use by non-academics</b> | None                                                |
| 27 |                                                 |                                                     |
| 28 |                                                 |                                                     |
| 29 |                                                 |                                                     |
| 30 |                                                 |                                                     |
| 31 |                                                 |                                                     |
| 32 |                                                 |                                                     |
| 33 |                                                 |                                                     |
| 34 |                                                 |                                                     |
| 35 |                                                 |                                                     |
| 36 |                                                 |                                                     |
| 37 |                                                 |                                                     |
| 38 |                                                 |                                                     |
| 39 |                                                 |                                                     |
| 40 |                                                 |                                                     |

41 186 **Declarations**  
42

43  
44  
45 187 [Acknowledgements](#)  
46

47  
48 188 We thank the participants in the UK Biobank and the scientists involved in the construction of this  
49  
50 189 resource. This research has been conducted using the UK Biobank Resource under application  
51  
52 18177 (Dr O'Reilly). We thank Hei Man Wu for providing critical feedback regarding this  
53 190  
54  
55 191 manuscript and for test running the software. We thank Jonathan Coleman and Kylie Glanville for  
56  
57  
58 192 the management of the UK Biobank resource at King's College London, and we thank Jack  
59  
60  
61  
62  
63  
64  
65

1  
2  
3  
4  
5  
6  
7  
8  
9  
10  
11  
12  
13  
14  
15  
16  
17  
18  
19  
20  
21  
22  
23  
24  
25  
26  
27  
28  
29  
30  
31  
32  
33  
34  
35  
36  
37  
38  
39  
40  
41  
42  
43  
44  
45  
46  
47  
48  
49  
50  
51  
52  
53  
54  
55  
56  
57  
58  
59  
60  
61  
62  
63  
64  
65

193 Euesden for his work on PRSice, which forms the basis of the current software. We thank  
194 Christopher Hübel, Eva Krapohl, Kirstin Purves, Jessye Maxwell, Saskia Hagenaars and Yunfeng  
195 Ruan for their help in test running the software. PFO receives funding from the UK Medical  
196 Research Council (MR/N015746/1). SWC is funded from the UK Medical Research Council  
197 (MR/N015746/1). This report represents independent research (part)-funded by the National  
198 Institute for Health Research (NIHR) Biomedical Research Centre at South London and Maudsley  
199 NHS Foundation Trust and King’s College London. The views expressed are those of the authors  
200 and not necessarily those of the NHS, the NIHR, or the Department of Health.

### 201 **Competing Interests**

202 The authors declare that they have no competing interests

### 203 **Authors’ contributions**

204 SWC and PFO designed the software. SWC implemented the software and drafted the manuscript.  
205 PFO provided critical feedback regarding the manuscript and the software development. All  
206 authors read and approved the final manuscript.

### 207 **References**

208 1. Mavaddat N, Pharoah PDP, Michailidou K, Tyrer J, Brook MN, Bolla MK, et al. Prediction of  
209 Breast Cancer Risk Based on Profiling With Common Genetic Variants. JNCI J Natl Cancer Inst  
210 [Internet]. 2015 [cited 2017 Jun 13];107. Available from:  
211 [https://academic.oup.com/jnci/article/107/5/djv036/891009/Prediction-of-Breast-Cancer-Risk-](https://academic.oup.com/jnci/article/107/5/djv036/891009/Prediction-of-Breast-Cancer-Risk-Based-on)  
212 [Based-on](https://academic.oup.com/jnci/article/107/5/djv036/891009/Prediction-of-Breast-Cancer-Risk-Based-on)

213 2. Kuchenbaecker KB, McGuffog L, Barrowdale D, Lee A, Soucy P, Healey S, et al. Evaluation  
214 of Polygenic Risk Scores for Breast and Ovarian Cancer Risk Prediction in BRCA1 and BRCA2  
215 Mutation Carriers. JNCI J Natl Cancer Inst [Internet]. 2017 [cited 2018 Sep 26];109. Available  
216 from: <https://www.ncbi.nlm.nih.gov/pmc/articles/PMC5408990/>

217 3. Natarajan P, Young R, Stitzel NO, Padmanabhan S, Baber U, Mehran R, et al. Polygenic Risk  
218 Score Identifies Subgroup with Higher Burden of Atherosclerosis and Greater Relative Benefit

1  
2  
3  
4 219 from Statin Therapy in the Primary Prevention Setting. *Circulation*.  
5 220 2017;CIRCULATIONAHA.116.024436.  
6  
7  
8 221 4. Udler MS, Kim J, Grotthuss M von, Bonas-Guarch S, Mercader JM, Cole JB, et al. Clustering  
9 222 of Type 2 Diabetes Genetic Loci by Multi-Trait Associations Identifies Disease Mechanisms and  
10 223 Subtypes. *bioRxiv*. 2018;319509.  
11  
12 224 5. Krapohl E, Euesden J, Zabaneh D, Pingault J-B, Rimfeld K, von Stumm S, et al. Phenome-  
13 225 wide analysis of genome-wide polygenic scores. *Mol Psychiatry*. 2016;21:1188–93.  
14  
15  
16 226 6. Krapohl E, Patel H, Newhouse S, Curtis CJ, Stumm S von, Dale PS, et al. Multi-polygenic  
17 227 score approach to trait prediction. *Mol Psychiatry*. 2018;23:1368–74.  
18  
19 228 7. Selzam S, Krapohl E, von Stumm S, O’Reilly PF, Rimfeld K, Kovas Y, et al. Predicting  
20 229 educational achievement from DNA. *Mol Psychiatry*. 2017;22:267–72.  
21  
22  
23 230 8. Selzam S, Dale PS, Wagner RK, DeFries JC, Cederlöf M, O’Reilly PF, et al. Genome-Wide  
24 231 Polygenic Scores Predict Reading Performance Throughout the School Years. *Sci Stud Read*.  
25 232 2017;21:334–49.  
26  
27  
28 233 9. Du Rietz E, Coleman J, Glanville K, Choi SW, O’Reilly PF, Kuntsi J. Association of  
29 234 Polygenic Risk for Attention-Deficit/Hyperactivity Disorder With Co-occurring Traits and  
30 235 Disorders. *Biol Psychiatry Cogn Neurosci Neuroimaging*. 2018;3:635–43.  
31  
32 236 10. Sudlow C, Gallacher J, Allen N, Beral V, Burton P, Danesh J, et al. UK Biobank: An Open  
33 237 Access Resource for Identifying the Causes of a Wide Range of Complex Diseases of Middle  
34 238 and Old Age. *PLOS Med*. 2015;12:e1001779.  
35  
36  
37 239 11. Danciu I, Cowan JD, Basford M, Wang X, Saip A, Osgood S, et al. Secondary use of clinical  
38 240 data: The Vanderbilt approach. *J Biomed Inform*. 2014;52:28–35.  
39  
40  
41 241 12. Kaiser J. NIH’s 1-million-volunteer precision medicine study announces first pilot projects.  
42 242 *Science* [Internet]. 2016 [cited 2018 Nov 15]; Available from:  
43 243 [https://www.sciencemag.org/news/2016/02/nih-s-1-million-volunteer-precision-medicine-study-](https://www.sciencemag.org/news/2016/02/nih-s-1-million-volunteer-precision-medicine-study-announces-first-pilot-projects)  
44 244 [announces-first-pilot-projects](https://www.sciencemag.org/news/2016/02/nih-s-1-million-volunteer-precision-medicine-study-announces-first-pilot-projects)  
45  
46  
47 245 13. Euesden J, Lewis CM, O’Reilly PF. PRSice: Polygenic Risk Score software. *Bioinformatics*.  
48 246 2015;31:1466–8.  
49  
50 247 14. Choi SW, Mak TSH, O’Reilly P. A guide to performing Polygenic Risk Score analyses.  
51 248 *bioRxiv*. 2018;416545.  
52  
53  
54 249 15. Mak TSH, Porsch RM, Choi SW, Zhou X, Sham PC. Polygenic scores via penalized  
55 250 regression on summary statistics. *Genet Epidemiol*. 2017;41:469–80.  
56  
57 251 16. Vilhjálmsson BJ, Yang J, Finucane HK, Gusev A, Lindström S, Ripke S, et al. Modeling  
58 252 Linkage Disequilibrium Increases Accuracy of Polygenic Risk Scores. *Am J Hum Genet*.  
59 253 2015;97:576–92.  
60  
61  
62  
63  
64  
65

1  
2  
3  
4 254 17. Chang CC, Chow CC, Tellier LC, Vattikuti S, Purcell SM, Lee JJ. Second-generation  
5 255 PLINK: rising to the challenge of larger and richer datasets. *GigaScience*. 2015;4:7.  
6  
7  
8 256 18. Wray NR, Lee SH, Mehta D, Vinkhuyzen AAE, Dudbridge F, Middeldorp CM. Research  
9 257 review: Polygenic methods and their application to psychiatric traits. *J Child Psychol Psychiatry*.  
10 258 2014;55:1068–87.  
11  
12 259 19. Li Y, Willer C, Sanna S, Abecasis G. Genotype Imputation. *Annu Rev Genomics Hum*  
13 260 *Genet*. 2009;10:387–406.  
14  
15  
16 261 20. Wood AR, Esko T, Yang J, Vedantam S, Pers TH, Gustafsson S, et al. Defining the role of  
17 262 common variation in the genomic and biological architecture of adult human height. *Nat Genet*.  
18 263 2014;46:1173–86.  
19  
20  
21 264 21. Locke AE, Kahali B, Berndt SI, Justice AE, Pers TH, Day FR, et al. Genetic studies of body  
22 265 mass index yield new insights for obesity biology. *Nature*. 2015;518:197–206.  
23  
24 266 22. North BV, Curtis D, Sham PC. A Note on the Calculation of Empirical P Values from Monte  
25 267 Carlo Procedures. *Am J Hum Genet*. 2002;71:439–41.  
26  
27  
28 268 23. Allegrini A, Selzam S, Rimfeld K, Stumm S von, Pingault J-B, Plomin R. Genomic  
29 269 prediction of cognitive traits in childhood and adolescence. *bioRxiv*. 2018;418210.  
30  
31 270 24. Hagenaars SP, Harris SE, Davies G, Hill WD, Liewald DCM, Ritchie SJ, et al. Shared  
32 271 genetic aetiology between cognitive functions and physical and mental health in UK Biobank  
33 272 (N=112 151) and 24 GWAS consortia. *Mol Psychiatry*. 2016;21:1624–32.  
34  
35  
36 273  
37  
38  
39  
40  
41  
42  
43  
44  
45  
46  
47  
48  
49  
50  
51  
52  
53  
54  
55  
56  
57  
58  
59  
60  
61  
62  
63  
64  
65

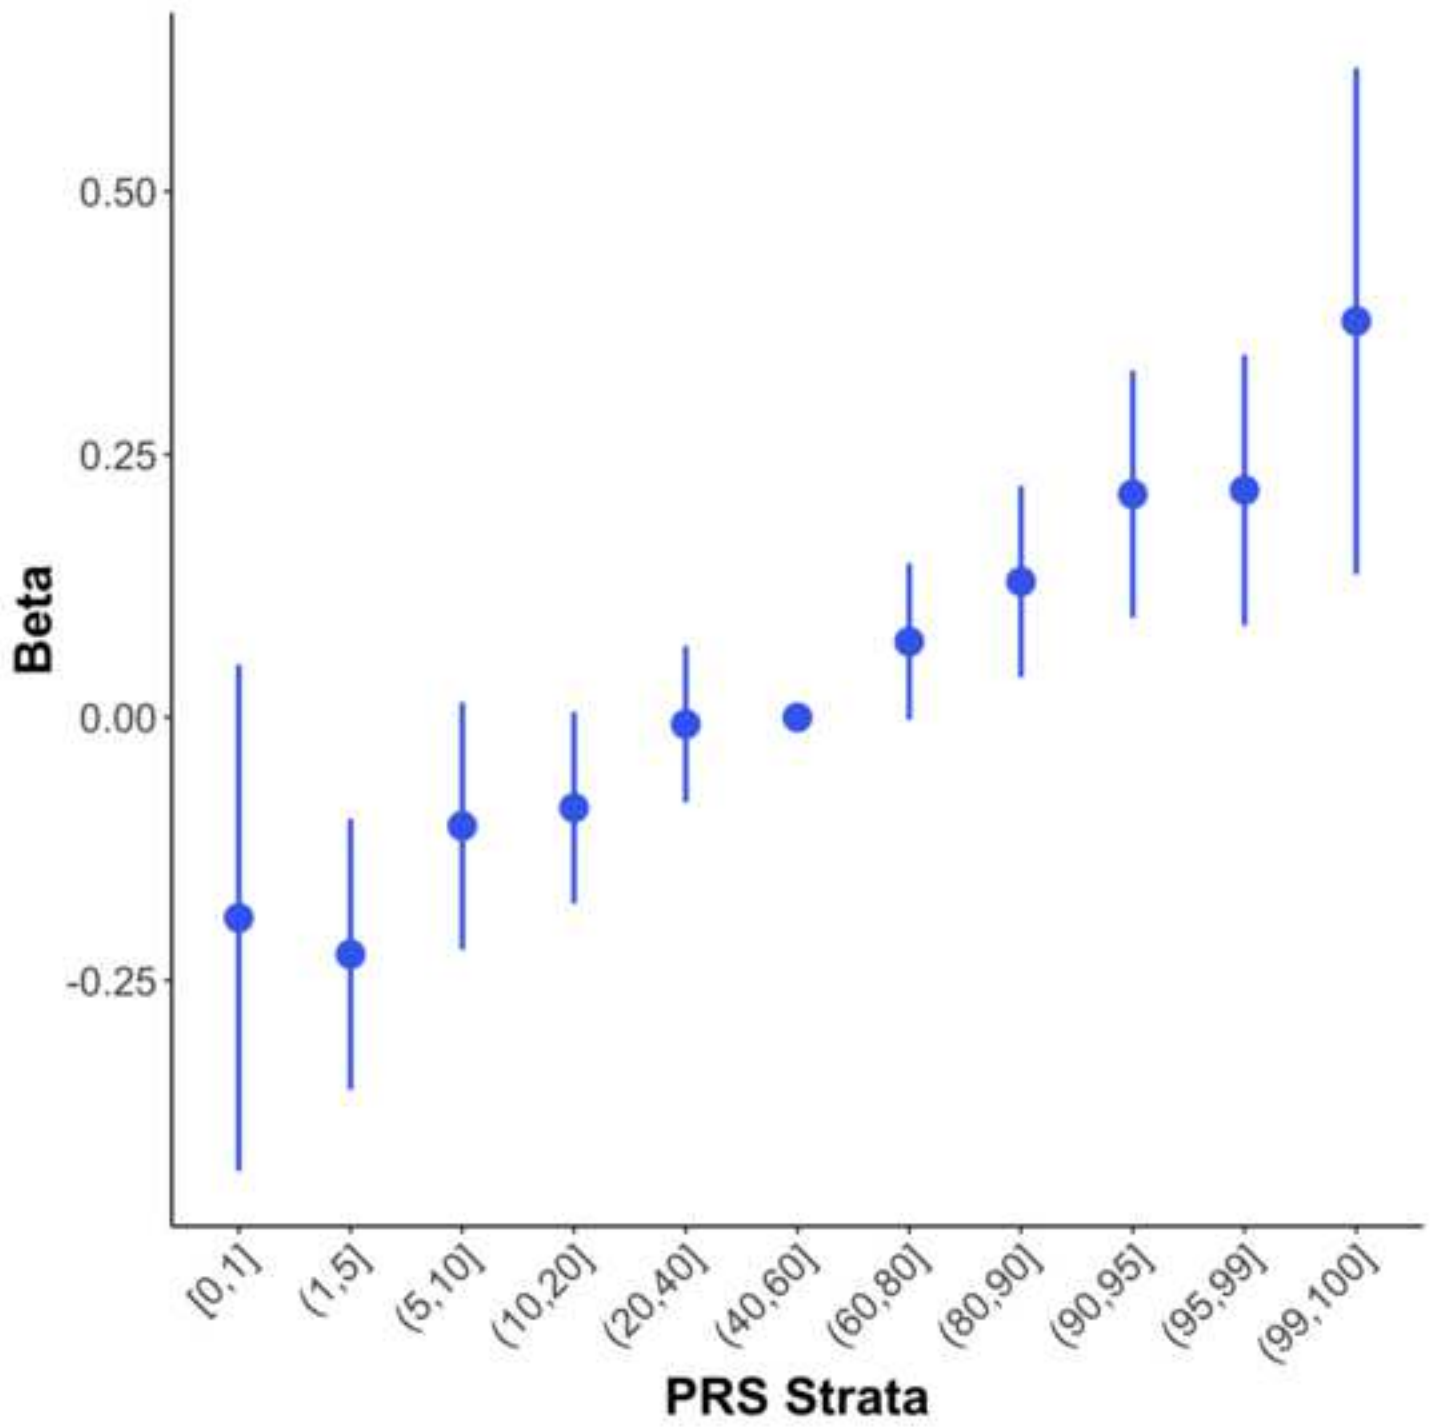



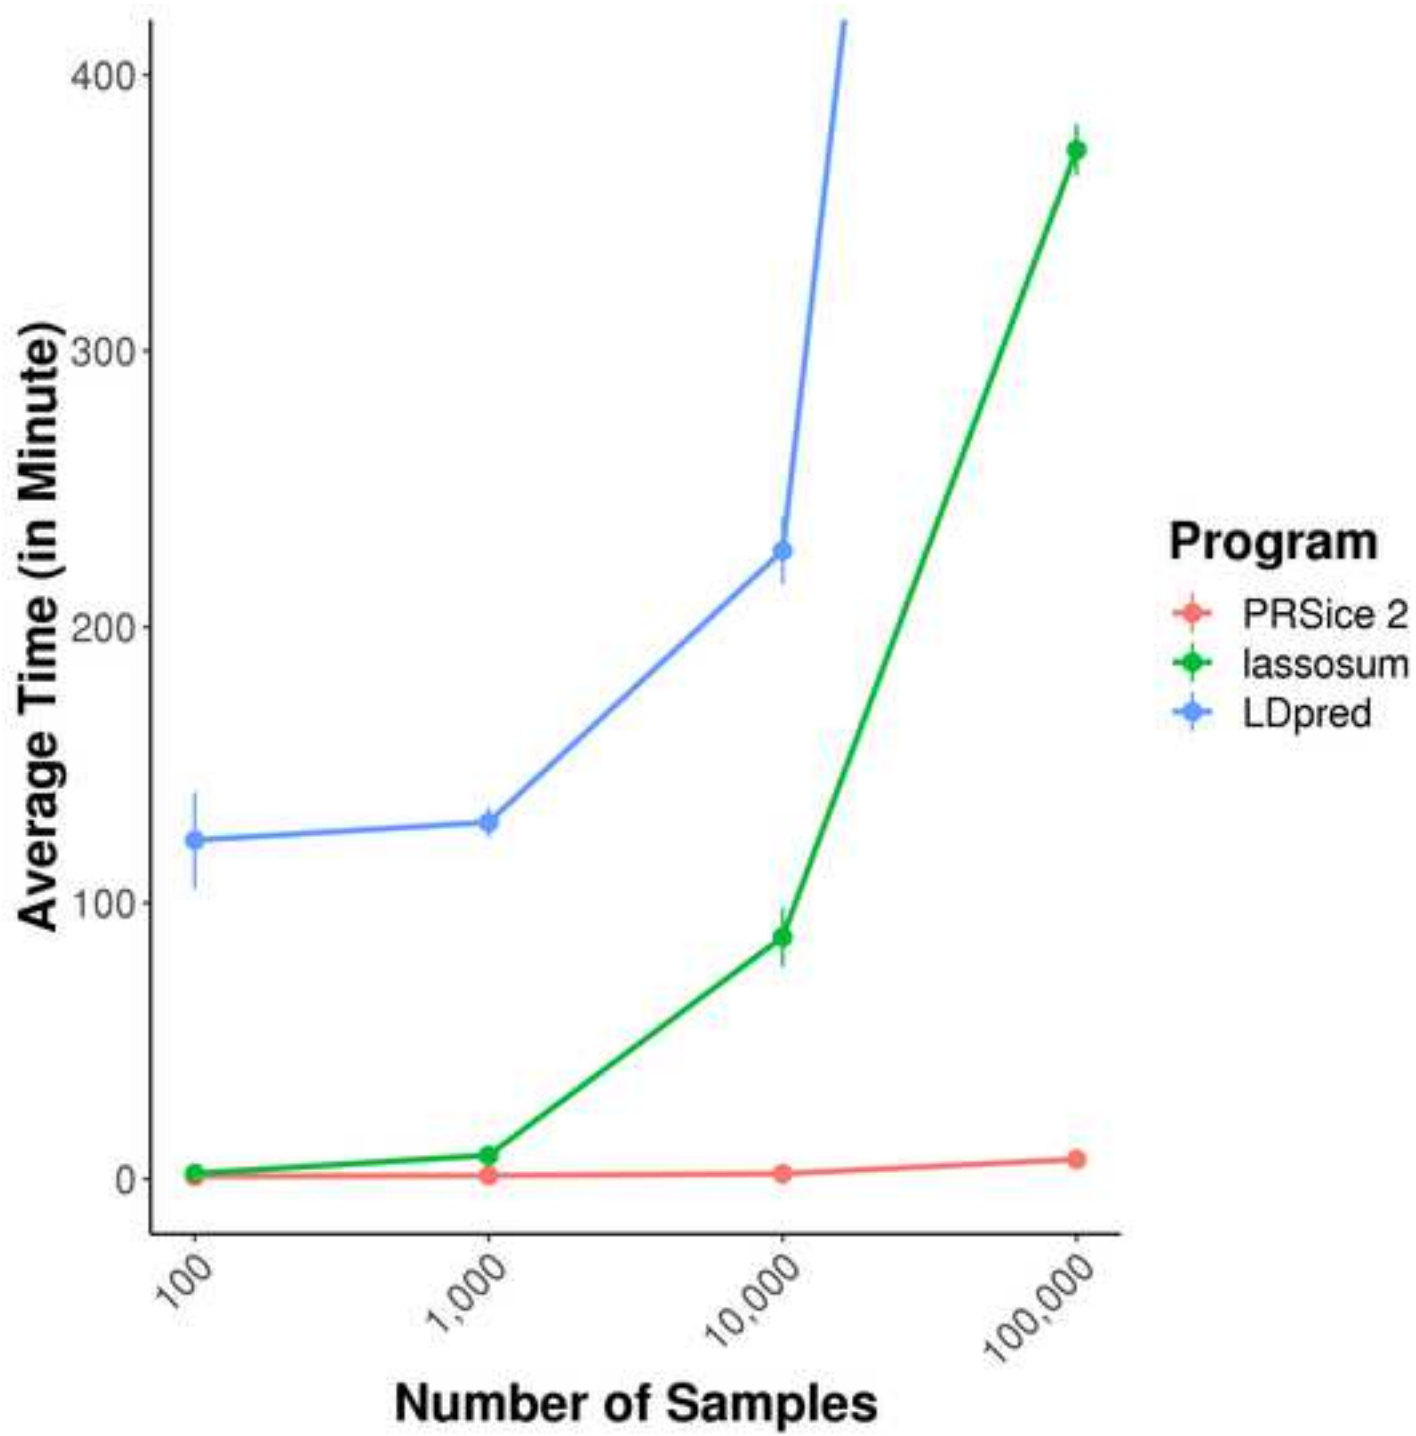

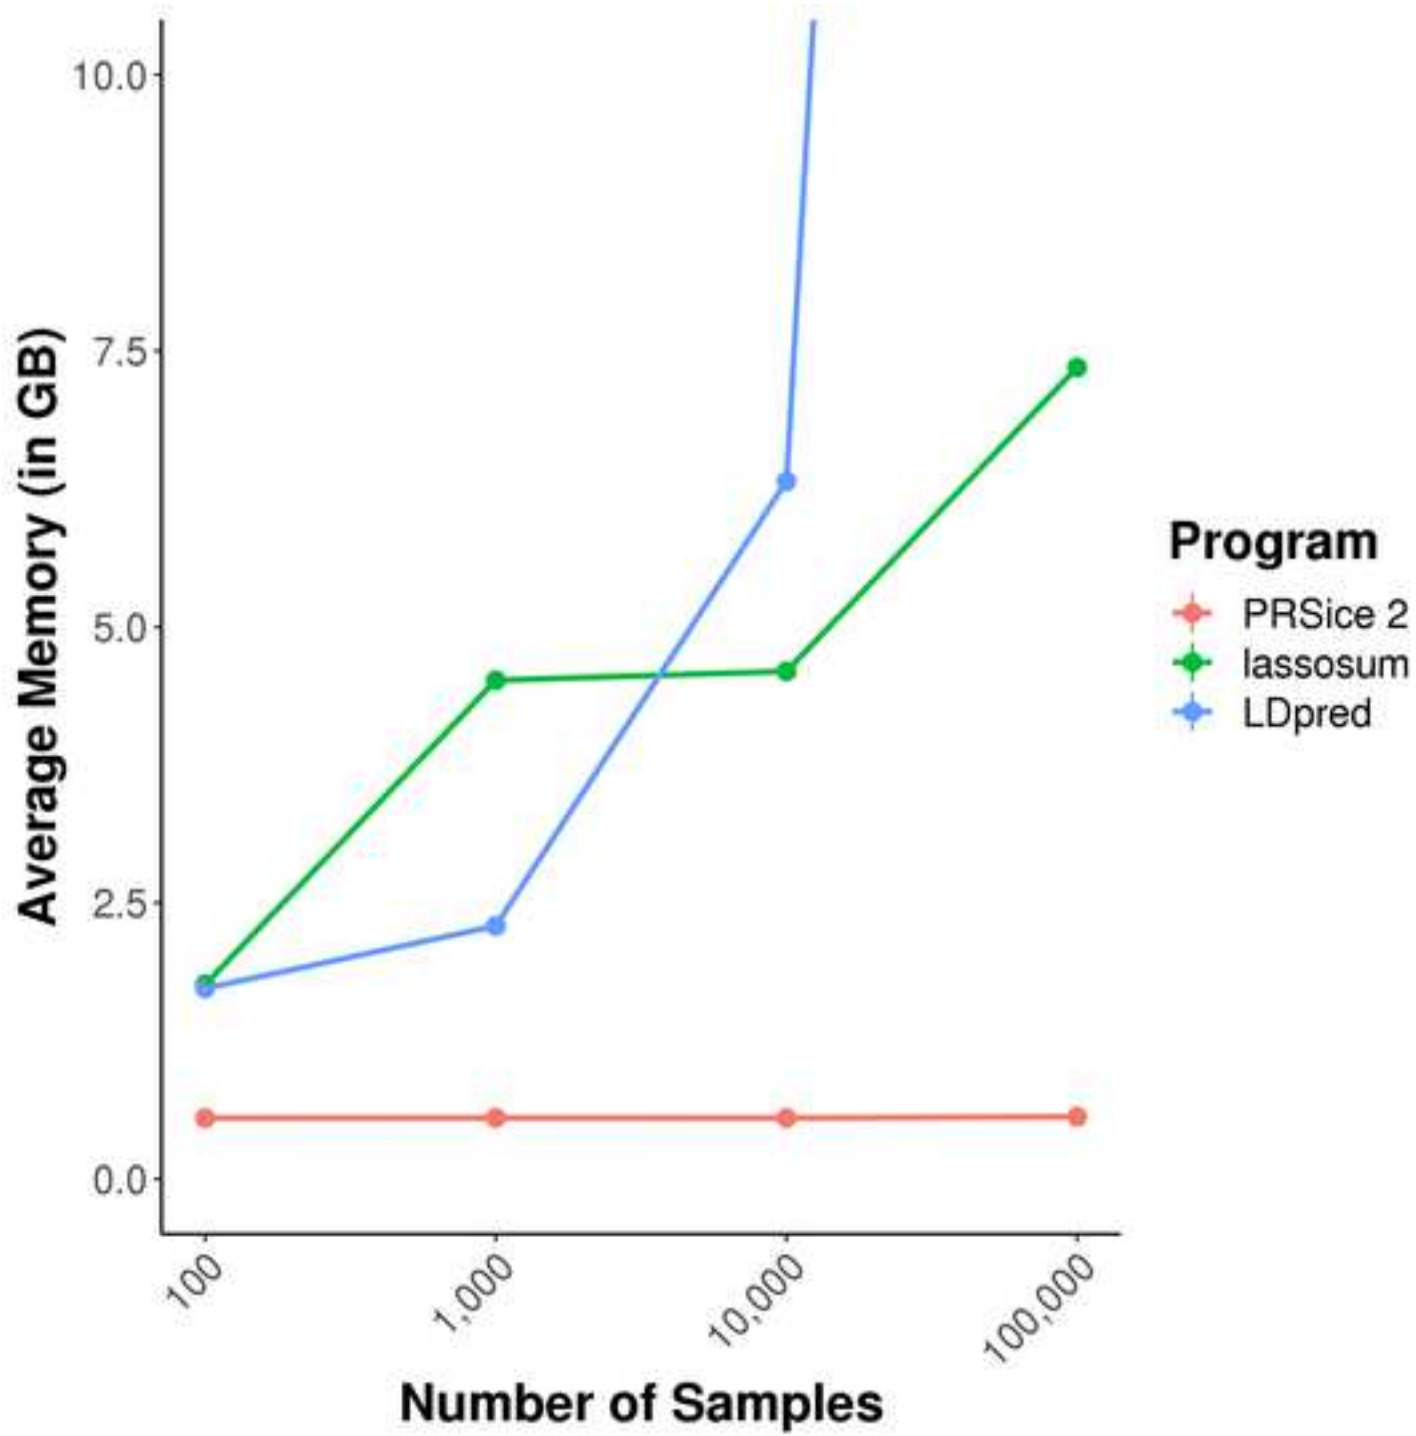

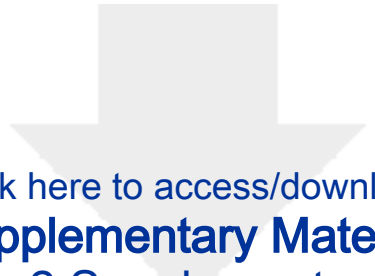

Click here to access/download  
**Supplementary Material**  
PRSize2 Supplementary.docx

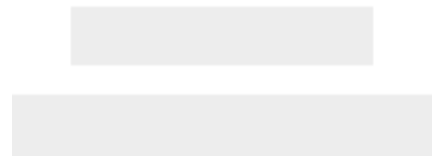

MRC Social, Genetic &  
Developmental Psychiatry Centre  
Director Francesca Happé

16 De Crespigny Park  
Denmark Hill  
London SE5 8AF

Dr Shing Wan Choi  
Email: [shing\\_wan.choi@kcl.ac.uk](mailto:shing_wan.choi@kcl.ac.uk)  
Telephone: +44 (0)7729246486

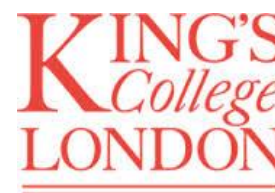

***A guide to performing polygenic risk score analyses***  
*(For submission as a Technical Note)*

27<sup>th</sup> November 2018

Dear Editor

Polygenic Risk Score (PRS) analyses have become an integral part of biomedical research, with promising clinical and scientific utility. Substantial efforts are now devoted to biobank projects to collect large genetic and phenotypic data, providing unprecedented opportunity for genetic discovery and application. However, the increased data size poses a substantial computational challenge to existing PRS tools, calling for the development of more efficient and scalable software.

Here, we present PRSice-2, a complete overhaul of our popular PRS software PRSice (Euesden et al. 2015; 286 citations, 150 citations in 2018). We have re-written the PRSice code in C++, making all code class/function based and thus more amenable to (user) extensions, have incorporated parts of the high performance PLINK-1.9 (Chang et al. 2015) algorithm where optimal, have extended data format options (eg. to BGEN), and via dramatic speed-ups and reductions in disk space requirement have made PRSice-2 now suitable for biobank scale data. A range of user-options and new features were also implemented in PRSice-2, providing increased flexibility and improved usability.

We present a performance comparison, demonstrating that PRSice-2 has a superior runtime compared to other leading PRS software, lassosum (Mak et al. 2017) and LDpred (Vilhjálmsón et al. 2015), having 45x and 143x faster runtime for PRS analyses performed on 10k samples. For the same data, PRSice-2 only requires 563Mb of memory, 13x less than the 7.35Gb required by lassosum and 90x less than the 51.2Gb required by LDpred. With its quick runtime and low memory usage, PRSice-2 can perform PRS analyses at scale on a desktop computer.

PRSice-2 is an open-source software, under GPL-3.0 license, with clear documentation (<https://goo.gl/MFNvZX>) and active support (<https://goo.gl/Bb4hDT>), making PRSice-2 arguably the most user-friendly PRS software. Given the popularity of PRSice, and the efficiency and functionality improvements of PRSice-2, we believe that our release and description of PRSice-2 would be ideally suited to GigaScience as a 'Technical Note'. We look forward to hearing back from you on this

Shing Wan Choi (cc'ed Paul F. O'Reilly)
