# Supplementary material for: PRSice-2: Polygenic Risk Score software for biobank-scale data
Source: PubMed Central journal article supplement (PMC6629542; doi:10.1093/gigascience/giz082), 2019-07-15
Supplement: giz082_giga-d-18-00468_revision_1.pdf [file giz082_giga-d-18-00468_revision_1.pdf]

|                                                      |                                                                                                                                                                                                                                                                                                                                                                                                                                                                                                                                                                                                                                                                                                                                                                                                                                                                                                                                                                                                                                                                                                                                                                                                                                                                                                                                                                                                                                                                                                                                                                                                                                                                                                                |                                         |
|------------------------------------------------------|----------------------------------------------------------------------------------------------------------------------------------------------------------------------------------------------------------------------------------------------------------------------------------------------------------------------------------------------------------------------------------------------------------------------------------------------------------------------------------------------------------------------------------------------------------------------------------------------------------------------------------------------------------------------------------------------------------------------------------------------------------------------------------------------------------------------------------------------------------------------------------------------------------------------------------------------------------------------------------------------------------------------------------------------------------------------------------------------------------------------------------------------------------------------------------------------------------------------------------------------------------------------------------------------------------------------------------------------------------------------------------------------------------------------------------------------------------------------------------------------------------------------------------------------------------------------------------------------------------------------------------------------------------------------------------------------------------------|-----------------------------------------|
| <b>Manuscript Number:</b>                            | GIGA-D-18-00468R1                                                                                                                                                                                                                                                                                                                                                                                                                                                                                                                                                                                                                                                                                                                                                                                                                                                                                                                                                                                                                                                                                                                                                                                                                                                                                                                                                                                                                                                                                                                                                                                                                                                                                              |                                         |
| <b>Full Title:</b>                                   | PRSice-2: Polygenic Risk Score Software for Large-Scale Data                                                                                                                                                                                                                                                                                                                                                                                                                                                                                                                                                                                                                                                                                                                                                                                                                                                                                                                                                                                                                                                                                                                                                                                                                                                                                                                                                                                                                                                                                                                                                                                                                                                   |                                         |
| <b>Article Type:</b>                                 | Technical Note                                                                                                                                                                                                                                                                                                                                                                                                                                                                                                                                                                                                                                                                                                                                                                                                                                                                                                                                                                                                                                                                                                                                                                                                                                                                                                                                                                                                                                                                                                                                                                                                                                                                                                 |                                         |
| <b>Funding Information:</b>                          | UK Medical Research Council<br>(MR/N015746/1)                                                                                                                                                                                                                                                                                                                                                                                                                                                                                                                                                                                                                                                                                                                                                                                                                                                                                                                                                                                                                                                                                                                                                                                                                                                                                                                                                                                                                                                                                                                                                                                                                                                                  | Dr Shing Wan Choi<br>Dr Paul F O'Reilly |
| <b>Abstract:</b>                                     | <p><b>Background</b></p> <p>Polygenic Risk Score (PRS) analyses have become an integral part of biomedical research, exploited to gain insights into shared aetiology among traits, to control for genomic profile in experimental studies, and to strengthen causal inference, among a range of applications. Substantial efforts are now devoted to biobank projects to collect large genetic and phenotypic data, providing unprecedented opportunity for genetic discovery and applications. To process the large-scale data provided by such biobank resources, highly efficient and scalable methods and software are required.</p> <p><b>Method</b></p> <p>Here we introduce PRSice-2, an efficient and scalable software for automating and simplifying polygenic risk score analyses on large-scale data. PRSice-2 handles both genotyped and imputed data, provides empirical association P-values free from inflation due to overfitting, supports different inheritance models and can evaluate multiple continuous and binary target traits simultaneously. We demonstrate that PRSice-2 is dramatically faster and more memory-efficient than PRSice and alternative polygenic score software, LDpred and lassosum, while having comparable predictive power. This combination of efficiency and power will be increasingly important as data sizes grow and as the applications of PRS become more sophisticated; for example, when incorporated into high-dimensional or gene-set based analyses.</p> <p><b>Conclusion</b></p> <p>PRSice-2 is written in C++, with an R script for plotting, and is freely available for download from <a href="http://PRSice.info">http://PRSice.info</a></p> |                                         |
| <b>Corresponding Author:</b>                         | Paul O'Reilly<br><br>UNITED KINGDOM                                                                                                                                                                                                                                                                                                                                                                                                                                                                                                                                                                                                                                                                                                                                                                                                                                                                                                                                                                                                                                                                                                                                                                                                                                                                                                                                                                                                                                                                                                                                                                                                                                                                            |                                         |
| <b>Corresponding Author Secondary Information:</b>   |                                                                                                                                                                                                                                                                                                                                                                                                                                                                                                                                                                                                                                                                                                                                                                                                                                                                                                                                                                                                                                                                                                                                                                                                                                                                                                                                                                                                                                                                                                                                                                                                                                                                                                                |                                         |
| <b>Corresponding Author's Institution:</b>           |                                                                                                                                                                                                                                                                                                                                                                                                                                                                                                                                                                                                                                                                                                                                                                                                                                                                                                                                                                                                                                                                                                                                                                                                                                                                                                                                                                                                                                                                                                                                                                                                                                                                                                                |                                         |
| <b>Corresponding Author's Secondary Institution:</b> |                                                                                                                                                                                                                                                                                                                                                                                                                                                                                                                                                                                                                                                                                                                                                                                                                                                                                                                                                                                                                                                                                                                                                                                                                                                                                                                                                                                                                                                                                                                                                                                                                                                                                                                |                                         |
| <b>First Author:</b>                                 | Shing Wan Choi                                                                                                                                                                                                                                                                                                                                                                                                                                                                                                                                                                                                                                                                                                                                                                                                                                                                                                                                                                                                                                                                                                                                                                                                                                                                                                                                                                                                                                                                                                                                                                                                                                                                                                 |                                         |
| <b>First Author Secondary Information:</b>           |                                                                                                                                                                                                                                                                                                                                                                                                                                                                                                                                                                                                                                                                                                                                                                                                                                                                                                                                                                                                                                                                                                                                                                                                                                                                                                                                                                                                                                                                                                                                                                                                                                                                                                                |                                         |
| <b>Order of Authors:</b>                             | Shing Wan Choi<br>Paul F O'Reilly                                                                                                                                                                                                                                                                                                                                                                                                                                                                                                                                                                                                                                                                                                                                                                                                                                                                                                                                                                                                                                                                                                                                                                                                                                                                                                                                                                                                                                                                                                                                                                                                                                                                              |                                         |
| <b>Order of Authors Secondary Information:</b>       |                                                                                                                                                                                                                                                                                                                                                                                                                                                                                                                                                                                                                                                                                                                                                                                                                                                                                                                                                                                                                                                                                                                                                                                                                                                                                                                                                                                                                                                                                                                                                                                                                                                                                                                |                                         |
| <b>Response to Reviewers:</b>                        | Reviewer #1: Choi et al. have proposed a new extension of their PRSice method. The new method, PRSice-2, main advantage is speed as most of the code is written in C++ and PRSice-2 avoid creating intermediate files.                                                                                                                                                                                                                                                                                                                                                                                                                                                                                                                                                                                                                                                                                                                                                                                                                                                                                                                                                                                                                                                                                                                                                                                                                                                                                                                                                                                                                                                                                         |                                         |

Major Comments:

1. The authors claim that their method is faster and more memory efficient than LDpred and lassosum. However, the authors need to compare these methods in case of prediction accuracy as well.

>> Thank you for your suggestion, which we think has now made our Technical Note more comprehensive. We have now included a full simulation analysis investigating the predictive accuracy of PRSice-2 compared to LDpred and lassosum (see Figure 3 and Supplementary Figure 2).

2. I like to see experiments where the authors compare PRSice-2 with PRSice performance.

>> We have now performed a comparison between PRSice-2 and PRSice-v1.25, both in terms of speed and memory (predictive accuracy is the same given the same underlying approach). Results can be found in Supplementary Figure 1, Supplementary Table 1 and Supplementary Table 2

Minor Comments:

The authors need to comment regarding the case where we have multiple populations in a study. For example Luna et al. Genetic epidemiology 2017 work discuss how to solve this problem.

The authors need to mention some of their method limitations in the discussion section.

>> Thank you for your comment. We agree that differences in allele frequencies, linkage disequilibrium and factors such as genetic drift and natural selection between populations can reduce the generalisability of PRS analyses across populations and produce misleading results, as suggested by Martin et. al. (2017) and as described in our 'Guide to performing polygenic risk score analyses' (Choi, Mak, O'Reilly. 2018. bioRxiv). We have now described this issue in our discussion, citing Duncan et al, Luna et al, Martin et al and Choi et al, and we caution users to take extra care when performing cross-population and family-wise PRS analyses.

Reviewer #2: This article reports the release of a new version of the PRSice software for polygenic score calculation. The new version of the software boasts speed enhancements that make it appealing for applications in the growing number of ultra-large genetically-informed datasets including the UK Biobank, 23andMe and others. Also important are features allowing for polygenic score computation from imputed genotype datasets in which genotypes are represented as a probabilities rather than discrete allele counts.

The data on speed are compelling. This alone is a good argument for why PRSice v1 users should upgrade to v2. But I found the article thinner on two other key questions central to addressing whether those not already using PRSice v2 should take up PRSice v2:

(1) Does the polygenic scoring method implemented within PRSice2 (additive combination of SNPs with/without LD clumping) deliver comparably predictive scores to other software, e.g. the LDpred and lassosum softwares?

>> Thank you for your comment and we agree that this is an important question. To address this, we have now performed a comprehensive simulation analysis to demonstrate the predictive power of PRSice-2 Vs LDpred and lassosum (see Figure 3 and Supplementary Figure 2).

(2) What is the value added of being able to accommodate imputed genotype probabilities rather than relying exclusively on discrete allele count data?

>> We thank the reviewer for this comment. We have now also performed an analysis to compare the predictive power of PRS constructed from genotyped data, or from imputed data either in terms of best-guess genotypes or dosage values. Briefly, the R2 for the Height PRS increased from 0.145 when using genotyped data to 0.152 when

using best-guess imputed genotypes, and to 0.153 when using dosage data; likewise the R2 for BMI increased from 0.0475 when using genotype data to 0.0529 when using best-guess genotypes, and to 0.0535 when using dosage data.

I would suggest the following revisions:

Re PRSice2 vs. Alternative Softwares: The authors assert that the method of polygenic score calculation implemented within PRSice2 generates scores that are comparably predictive to two other methodologies, LDSPred and Lassosum. It is my understanding that these methods were developed and are in use precisely because they outperform the method implemented in PRSice in terms of the prediction R-squared for the target phenotype. It would improve the article if the authors could provide some empirical evidence for the claim that their software delivers polygenic scores of comparable accuracy to other methods. For example, comparison of PRSice2 scores to scores generated from LDSPred and lassosum for a set of traits would be helpful. I like the choices of height and BMI. But it might also be sensible to consider a trait for which existing GWAS are smaller/ polygenic predictions are less accurate, e.g. depression.

>> Please see above response

Re Imputed Genotype Probabilities vs. Allele Counts: The authors helpfully report that PRSice2 scores computed with imputed data can improve prediction accuracy by about 1 percentage point for height and BMI as compared to scores computed with genotyped-only data. It would be helpful to add an element to this analysis. As I understand it, the authors are comparing a genotyped-SNP-only polygenic score computed from allele counts to an imputed-SNP polygenic score computed from genotype probabilities. But these are not the only two possibilities. In much polygenic score analysis, imputed SNP probabilities are converted to discrete genotypes using a threshold (e.g. probability=0.9) to determine whether a given genotype can be assigned to the SNP. Since this is common practice in the field, it seems to me that it would be helpful to include this approach in the comparison.

>> Please see above response

Finally, I have one small quibble about language:

In the introduction, the authors assert that polygenic scores have proven clinical utility. This is a bit of an overstatement. I think we can say that "provocative new data suggest the potential for polygenic scores to be useful in clinical settings" or something similar. The recent papers referenced by the authors are compelling. But the term clinical utility has a specific meaning - that application of a tool improves patient outcomes (e.g. see Torkamani et al. 2018 Nat Rev Genet). We are a long way off from that. Instead, the evidence we have supports an argument for the clinical validity of extreme polygenic-scores values for assessing disease risk.

>> We thank the reviewer for highlighting this and we entirely agree, that as worded, this could have led readers to a conclusion that we do not agree with ourselves (ie. we also believe that PRS are a long way off clinical utility at the individual-level). We have now changed the introduction as follows (note mention of 'stratified medicine' in the revised version, as opposed to personalized medicine):

"Polygenic Risk Score (PRS) analyses are beginning to play a critical role in biomedical research, being already sufficiently powered to provide scientific insights and with the potential to contribute to stratified medicine in the future [1-9]."

**Additional Information:**

**Question**

**Response**

Are you submitting this manuscript to a special series or article collection?

No

**Experimental design and statistics**

Yes

|                                                                                                                                                                                                                                                                                                                                                                                                                                                                                                                                                         |            |
|---------------------------------------------------------------------------------------------------------------------------------------------------------------------------------------------------------------------------------------------------------------------------------------------------------------------------------------------------------------------------------------------------------------------------------------------------------------------------------------------------------------------------------------------------------|------------|
| <p>Full details of the experimental design and statistical methods used should be given in the Methods section, as detailed in our <a href="#">Minimum Standards Reporting Checklist</a>. Information essential to interpreting the data presented should be made available in the figure legends.</p> <p>Have you included all the information requested in your manuscript?</p>                                                                                                                                                                       |            |
| <p><b>Resources</b></p> <p>A description of all resources used, including antibodies, cell lines, animals and software tools, with enough information to allow them to be uniquely identified, should be included in the Methods section. Authors are strongly encouraged to cite <a href="#">Research Resource Identifiers</a> (RRIDs) for antibodies, model organisms and tools, where possible.</p> <p>Have you included the information requested as detailed in our <a href="#">Minimum Standards Reporting Checklist</a>?</p>                     | <p>Yes</p> |
| <p><b>Availability of data and materials</b></p> <p>All datasets and code on which the conclusions of the paper rely must be either included in your submission or deposited in <a href="#">publicly available repositories</a> (where available and ethically appropriate), referencing such data using a unique identifier in the references and in the “Availability of Data and Materials” section of your manuscript.</p> <p>Have you have met the above requirement as detailed in our <a href="#">Minimum Standards Reporting Checklist</a>?</p> | <p>Yes</p> |

[Click here to view linked References](#)

# 1 PRSize-2: Polygenic Risk Score Software 2 for Large-Scale Data

3 Shing Wan Choi<sup>1\*</sup> and Paul O'Reilly<sup>1,2\*</sup>

4 *1 MRC Social, Genetic and Developmental Psychiatry Centre, Institute of Psychiatry,*  
5 *Psychology and Neuroscience, King's College London, London, United Kingdom*

6 *2 Icahn School of Medicine, Mount Sinai, New York City*

7 *\*To whom correspondence should be addressed.*

## 8 **Abstract**

9 **Background:** Polygenic Risk Score (PRS) analyses have become an integral part of biomedical  
10 research, exploited to gain insights into shared aetiology among traits, to control for genomic  
11 profile in experimental studies, and to strengthen causal inference, among a range of applications.  
12 Substantial efforts are now devoted to biobank projects to collect large genetic and phenotypic  
13 data, providing unprecedented opportunity for genetic discovery and applications. To process the  
14 large-scale data provided by such biobank resources, highly efficient and scalable methods and  
15 software are required.

16 **Method:** Here we introduce PRSize-2, an efficient and scalable software for automating and  
17 simplifying polygenic risk score analyses on large-scale data. PRSize-2 handles both genotyped  
18 and imputed data, provides empirical association  $P$ -values free from inflation due to overfitting,  
19 supports different inheritance models and can evaluate multiple continuous and binary target traits

1  
2  
3  
4  
5  
6  
7  
8  
9  
10  
11  
12  
13  
14  
15  
16  
17  
18  
19  
20  
21  
22  
23  
24  
25  
26  
27  
28  
29  
30  
31  
32  
33  
34  
35  
36  
37  
38  
39  
40  
41  
42  
43  
44  
45  
46  
47  
48  
49  
50  
51  
52  
53  
54  
55  
56  
57  
58  
59  
60  
61  
62  
63  
64  
65

20 simultaneously. We demonstrate that PRSice-2 is dramatically faster and more memory-efficient  
21 than PRSice and alternative polygenic score software, LDpred and lassosum, while having  
22 comparable predictive power. This combination of efficiency and power will be increasingly  
23 important as data sizes grow and as the applications of PRS become more sophisticated; for  
24 example, when incorporated into high-dimensional or gene-set based analyses.

25 **Conclusion:** PRSice-2 is written in C++, with an R script for plotting, and is freely available for  
26 download from <http://PRSice.info>

27 **Keywords:** Polygenic Risk Score, GWAS, Imputation

28  
29 Polygenic Risk Score (PRS) analyses are beginning to play a critical role in biomedical research,  
30 being already sufficiently powered to provide scientific insights and with the potential to contribute  
31 to stratified medicine in the future [1–9]. The increasing availability of genetic data from regional  
32 and national biobank projects [10–12] have allowed more powerful PRS to be calculated.  
33 However, the calculation of PRS, which involves parameter optimization [13–16], can be a  
34 computationally intensive process, especially for large datasets and when multiple analyses are  
35 conducted.

36  
37 To fully utilize the power of large datasets and to facilitate future method and application  
38 developments, at scale, we have performed a major overhaul of our original PRSice software [13],  
39 to produce PRSice-2. All code has been re-written in C++ and code from PLINK-1.9 [17] has been  
40 incorporated to optimize computation. As a result of the consistent language and switch to  
41 objected-oriented code, different analytical components of the code can communicate directly,

1  
2  
3  
4  
5  
6  
7  
8  
9  
10  
11  
12  
13  
14  
15  
16  
17  
18  
19  
20  
21  
22  
23  
24  
25  
26  
27  
28  
29  
30  
31  
32  
33  
34  
35  
36  
37  
38  
39  
40  
41  
42  
43  
44  
45  
46  
47  
48  
49  
50  
51  
52  
53  
54  
55  
56  
57  
58  
59  
60  
61  
62  
63  
64  
65

42 without, for example, the generation of intermediate files, such as those containing PRS  
43 corresponding to each  $P$ -value threshold, or post-processed genotype files. This has generated a  
44 substantial speed-up, a lower processing burden and a reduction in disk space requirement in  
45 PRSice-2. In addition, a separate plotting script was implemented in R. Separate tasks are  
46 organized into functions and are, thus, more amenable to tailored extensions by users. Finally, a  
47 range of user-options were incorporated into PRSice-2 to increase flexibility and improve  
48 usability.

49

## 50 [Features of PRSice-2](#)

51 PRSice-2 utilizes the same standard approach to PRS calculation as PRSice, involving clumping  
52 Single Nucleotide Polymorphisms (SNPs) (thinning SNPs according to linkage disequilibrium and  
53  $P$ -value) and then performing  $P$ -value thresholding, known as the “C+T” method [14], and retains  
54 the majority of the features of its predecessor [13], including automatic strand flipping, clumping  
55 [18], and calculation and evaluation of PRS under few (‘fastscore’) or many (‘high-resolution  
56 scoring’)  $P$ -value thresholds.

57

58 When compared to PRSice, PRSice-2 streamlines the entire PRS analysis pipeline without  
59 generating intermediate files, and performs all the main computations in C++, leading to a drastic  
60 speed-up in runtime and reduction in memory burden (see Supplementary Figure 1). Extraction  
61 and exclusion of samples and SNPs are also implemented, allowing PRS analysis to be performed  
62 directly on a subset of the input data without performing pre-filtering.

63 Briefly, the main features of PRSice-2 are:

1  
2  
3  
4  
5  
6  
7  
8  
9  
10  
11  
12  
13  
14  
15  
16  
17  
18  
19  
20  
21  
22  
23  
24  
25  
26  
27  
28  
29  
30  
31  
32  
33  
34  
35  
36  
37  
38  
39  
40  
41  
42  
43  
44  
45  
46  
47  
48  
49  
50  
51  
52  
53  
54  
55  
56  
57  
58  
59  
60  
61  
62  
63  
64  
65

- 64 1. Handles large-scale PRS analyses of both genotyped and imputed data
- 65 2. Computes empirical association  $P$ -values to account for over-fitting
- 66 3. Can perform PRS analyses on a large number of target phenotypes simultaneously
- 67 4. Provides several options for imputing missing genotypes
- 68 5. Allows calculation of PRS based on different inheritance models, including additive,  
69 dominant, recessive and heterozygous models
- 70 6. Automatically generates dummy variables for categorical covariates
- 71 7. Can perform regression to estimate relative effect/risk corresponding to samples in user-  
72 defined stratum of the population. Can output quantile and strata plots
- 73 8. Amenable to user extensions, such as relating to input data format, regression modelling  
74 and output

75

### 76 Handling of Imputed data

77 Genotypes are typically represented as the discrete counts of the minor or effect allele (0, 1 or 2),  
78 for single nucleotide polymorphisms (SNPs), in each individual. Genotypes not included in the  
79 genotyping chip can, potentially, be imputed and are usually either recorded as a set of three  
80 probabilities corresponding to the probability of each of the possible genotypes [19], or based on  
81 these, as the expected genotype (a real number between 0 and 2 known as the “dosage”) [19] or as  
82 the “best-guess” (most probable) genotype. While any of these data formats can be exploited in  
83 PRS analyses, the most common approach is to use the “best-guess” genotype for each individual.  
84 However, this approach does not account for the uncertainty in the imputed genotype.

85



1  
2  
3  
4  
5  
6  
7  
8  
9  
10  
11  
12  
13  
14  
15  
16  
17  
18  
19  
20  
21  
22  
23  
24  
25  
26  
27  
28  
29  
30  
31  
32  
33  
34  
35  
36  
37  
38  
39  
40  
41  
42  
43  
44  
45  
46  
47  
48  
49  
50  
51  
52  
53  
54  
55  
56  
57  
58  
59  
60  
61  
62  
63  
64  
65

86 Currently, most PRS software only support input of the genotyped format. Therefore, users need  
87 to generate a large intermediate file containing the best-guess genotypes and discard any  
88 information related to imputation uncertainty. To reduce the storage space requirement, and to  
89 incorporate imputation uncertainty into PRS analyses, PRSice-2 implements support for the BGEN  
90 imputation format. PRSice-2 can directly process the BGEN imputed format and either convert to  
91 best-guess genotypes or dosages when calculating the PRS, without generating a large intermediate  
92 file. While PRS based on best-guess genotypes are calculated as for genotyped input, dosage based  
93 PRS are calculated as

$$PRS = \left( \sum_i^m \beta_i \left( \sum_{j=0}^2 \omega_{ij} \times j \right) \right) \tag{1}$$

95 where  $\omega_{ij}$  is the probability of observing genotype  $j$ , where  $j \in \{0,1,2\}$ , for the  $i^{th}$  SNP,  $m$  is the  
96 number of SNPs and  $\beta_i$  is the effect size of the  $i^{th}$  SNP estimated from the relevant base GWAS  
97 data.

98  
99 The ability to perform PRS analyses directly on imputed data can be particularly useful when the  
100 base GWAS and target samples are genotyped on a different platform, as then there can be a small  
101 fraction of overlapping SNPs. For example, of the 725,459 post-QC SNPs (see Supplementary  
102 Material) in the UK Biobank genotype data [10], only 31% (222,956) of those were found in the  
103 GIANT Height and Body Mass Index (BMI) GWAS [20,21]. The use of imputed SNPs increases  
104 the number of overlapping SNPs to 2,121,036 SNPs. To assess the gain in power when using  
105 imputed vs un-imputed data, we performed PRS analyses on height and BMI using UK Biobank

1  
2  
3  
4  
5  
6  
7  
8  
9  
10  
11  
12  
13  
14  
15  
16  
17  
18  
19  
20  
21  
22  
23  
24  
25  
26  
27  
28  
29  
30  
31  
32  
33  
34  
35  
36  
37  
38  
39  
40  
41  
42  
43  
44  
45  
46  
47  
48  
49  
50  
51  
52  
53  
54  
55  
56  
57  
58  
59  
60  
61  
62  
63  
64  
65

106 genotyped and imputed data, with GWAS summary statistics provided by the GIANT consortium  
107 [20,21]. Age, sex, UK Biobank genotyping batch, UK Biobank assessment centre and 40 principle  
108 components were first regressed out from the phenotype and the standardized residuals were used  
109 instead.

110

111 We performed a linear regression using PRSice-2, with the UK Biobank data as target sample  
112 using the default parameters. When calculating PRS from the “best-guess” genotype, the “best-  
113 guess” genotype is defined as the genotype having an imputation probability of 0.9 or above. If  
114 there is no such genotype, then the SNP is considered to be missing for the individual. In addition,  
115 for the imputed data, we filtered out SNPs with imputation quality score less than 0.8. With height  
116 as the outcome and PRS for height as predictor, we observed an increase in phenotypic variance  
117 explained ( $R^2$ ) of the PRS from 0.145 when using genotyped data to 0.152 when using best-guess  
118 imputed genotypes, and 0.153 when using dosage data; likewise, the  $R^2$  for BMI increased from  
119 0.0475 when using genotype data to 0.0529 when using best-guess genotypes, and to 0.0535 when  
120 using dosage data. These results exemplify the potential gain in predictive power when using  
121 dosage data compared to using genotyped or best-guess genotype data. However, given the modest  
122 increases in predictive power, users may wish to perform first-pass analyses on genotyped-only  
123 data before application to the more computationally intensive imputed data. A further challenge in  
124 exploiting imputed data is that there are numerous imputed formats in use in the field. While it is  
125 difficult to support all imputed formats, PRSice-2 adopts a modular approach, which allows simple  
126 incorporation of supports for additional data formats (eg. vcf) in the future.

127

## 128 Calculation of Empirical $P$ -value

129 All approaches to PRS calculation involve parameter optimisation in generating the final  
130 prediction model, and are thus vulnerable to overfitting [14]. The best strategy to avoid overfitting  
131 is to evaluate performance in an independent validation sample, but such a sample is not always  
132 available. Alternatively, if the primary aim is to assess evidence for an association to test a  
133 hypothesis, then we can calculate an empirical  $P$ -value corresponding to the association of the  
134 optimized PRS, with the Type 1 error rate controlled [13].

135  
136 In PRSice-2, to obtain the empirical  $P$ -value, the target trait values are permuted across the sample  
137 of individuals  $k$  times (default = 10,000) and the PRS analysis is repeated on each set of permuted  
138 phenotypes. Thus, on each permutation, the “best-fit PRS” is obtained as that most associated with  
139 the target trait across the range of  $P$ -value thresholds considered, and the empirical  $P$ -value is  
140 calculated as:

$$\text{empirical } P = \frac{\sum_{n=1}^N I(P_n < P_o) + 1}{N + 1} \quad (2)$$

141 where  $N$  is the number of permutations performed,  $I(\cdot)$  is the indicator function, which takes a  
142 value of 0 if the “best-fit PRS” of permutation  $n$  is smaller than the observed  $P$ -value,  $P_o$ , and  
143 where pseudo-counts of 1 are added to the numerator and denominator to avoid empirical  $P$ -values  
144 of 0 and reflecting (conservatively) counting the observed trait configuration as one potential null  
145 permutation [22]. While the empirical  $P$ -values for association will be controlled for the Type 1  
146 error rate, since the same process of parameter optimisation is performed explicitly under the null  
147 hypothesis, the observed phenotypic variance explained,  $R^2$ , remains unadjusted and is affected by  
148 overfitting. Therefore, it is imperative to perform out-of-sample prediction, or cross-validation, to

1  
2  
3  
4  
5  
6  
7  
8  
9  
10  
11  
12  
13  
14  
15  
16  
17  
18  
19  
20  
21  
22  
23  
24  
25  
26  
27  
28  
29  
30  
31  
32  
33  
34  
35  
36  
37  
38  
39  
40  
41  
42  
43  
44  
45  
46  
47  
48  
49  
50  
51  
52  
53  
54  
55  
56  
57  
58  
59  
60  
61  
62  
63  
64  
65

149 evaluate the predictive accuracy of PRS when using PRSice-2, and ideally the former given the  
150 problems of generalisability observed with PRS [14].

151  
  
152 *Analysis of PRS strata*  
  
153 While PRS on most complex traits presently have limited power to accurately predict risk at the  
154 individual-level, which will remain the case for low-moderate heritability traits irrespective of  
155 GWAS sample sizes, recent studies have demonstrated that individuals at the tails of PRS  
156 distribution can have substantially higher disease risk than those of the general population. Thus,  
157 these individuals may provide useful subjects for experimental follow-up, while in clinical settings  
158 it could be more efficacious to employ different risk management strategies, in terms of screening  
159 or interventions, for example, for individuals with extreme PRS [1–3].

160  
  
161 We have implemented a strata analysis feature in PRSice-2 to aid the calculation of relative  
162 phenotypic risk of individuals between strata. Briefly, the  $N$  individuals of the target sample are  
163 first aggregated into  $M$  different strata based on their PRS. An  $N \times (M - 1)$  design matrix is then  
164 generated using dummy coding, such that an individual is coded 1 in the column that corresponds  
165 to their PRS stratum and whereby a user-defined stratum is the reference group (or the median  
166 stratum by default). A linear regression (for quantitative traits) or logistic regression (for binary  
167 traits) will then be performed to estimate the phenotypic difference or relative risk, respectively,  
168 of each stratum versus the reference. The set of corresponding beta-coefficients (linear) or the odds  
169 ratio (logistic), can then be visualized with the strata plot (Figure 1). This allow users to assess  
170 whether individuals in the extreme stratum have a substantially higher phenotypic risk when  
171 compared to the reference stratum.

## Figure 1

Figure 1 Strata plot generated by PRSice-2. The X-axis shows the range of different quantiles (eg. (80,90] corresponds to those individuals with PRS between the 80%-ile – 90%-ile of the population), and the Y-axis shows the odds ratio (OR) when comparing PRS from different quantiles with the reference quantile (here, (40,60]).

### Benchmarking

Here we perform a simulation study to compare the performance of PRSice-2 to alternative polygenic score software lassosum [15] and LDpred [16], in terms of runtime, memory usage and predictive power.

Quantitative traits with heritability ( $h^2$ ) of 0.2, 0.4, 0.6 and 0.8 were simulated with the UK Biobank genotype data (post-QC) as input. Briefly, each quantitative trait was simulated based on the following linear model:

$$Y = X\beta + \varepsilon \quad (3)$$

where  $X$  is the unstandardized genotype matrix corresponding to 385,794 individuals (rows) and 560,173 SNP genotypes (columns). The  $\beta$  vector corresponds to the effect size associated with each SNP, with 100, 1k, 10k, 100k and 560,173 (all SNPs) randomly selected to be causal SNPs with effect size  $\beta \sim N(0,1)$ ,  $\beta = 0$  otherwise, and  $\varepsilon$  represents the random error, which follows  $\varepsilon \sim N\left(0, \sqrt{\frac{\text{var}(X\beta)(1-h^2)}{h^2}}\right)$ . To control for batch effects and population structure in the genotype data, a regression of batch, UK Biobank assessment centre and 40 PCs against the simulated trait were performed as follows:

$$Y = \text{Batch} + \text{Centre} + 40 \text{ PCs} + \varepsilon \quad (4)$$

The standardized residuals were then used as the final simulated trait. 20k samples were randomly selected as the base sample and used to generate the GWAS summary statistics. 100, 1k, 10k and 100k samples independent from the base were then randomly selected as the target sample. PRS analyses were then performed on these base and target data using the latest version of lassosum (v0.4.3), LDpred (v1.0.0) and PRSice 2 (v2.1.8), on servers equipped with two 10 core Intel Haswell E5-2660 v3 @ 2.60GHz and 128GB of RAM. Default parameters of each

1  
2  
3  
4 197 program were used. The runtime and memory usage of each program were measured using the  
5  
6 198 Linux *time* command and the predictive power of the methods was assessed according to  
7  
8 199 phenotypic variance explained ( $R^2$ ). The entire process was repeated 10 times to obtain an  
9  
10 200 estimated distribution of runtime, memory usage and predictive power.  
11

12 201  
13  
14 202 Figure 2 shows the runtime and memory usage of PRSice-2, lassosum and LDpred. Based on  
15  
16 203 these simulation results, PRSice-2 is the most efficient software in all settings (Figure 2a),  
17  
18 204 significantly faster than lassosum ( $P = 3.06e-49$ , one sided t-test) and LDpred ( $P = 9.06e-86$ , one  
19  
20 205 sided t-test). Specifically, PRSice-2 can complete the full PRS analysis on 100k samples within 8  
21  
22 206 minutes (Supplementary Table 1), which is 78x faster than the 9 hours 21 minutes required by  
23  
24 207 lassosum, and 109x faster than the 13 hours 7 minutes required by LDpred. Likewise, PRSice-2  
25  
26 208 requires significantly less memory (Figure 2b) than lassosum ( $P = 1.13e-150$ , one sided t-test)  
27  
28 209 and LDpred ( $P = 1.21e-139$ , one sided t-test), requiring less than 500MB of memory for 100k  
29  
30 210 samples, as opposed to 11.6GB required by lassosum and 38.1 GB required by LDpred  
31  
32 211 (Supplementary Table 2). Likewise, PRSice-2 outperforms PRSice-v1.25, requiring 200x less  
33  
34 212 time and 7x less memory for a target sample size of 10k (similar memory for small target  
35  
36 213 samples. See Supplementary Figure 1, Supplementary Tables 1,2 for details). As data size grows,  
37  
38 214 or when more sophisticated PRS analyses are performed at scale [5,23], these gains in  
39  
40 215 computational efficiency could become even more important.  
41

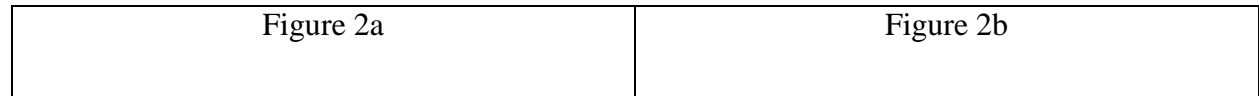

42  
43  
44  
45  
46 217 *Figure 2 Performance of the three PRS software on simulated data. a) Average run time (in minutes) required to complete the*  
47  
48 218 *entire analysis, across 10 repeats, when applied to different sizes of target sample. b) Average memory (in GB) required for the*  
49  
50 219 *different software to process the different sizes of target sample.*  
51

52 220 Figure 3 shows the predictive power of PRSice-2 when compared to lassosum and LDpred for  
53  
54 221 quantitative traits with heritability of 0.6 and target sample size of 10k (see Supplementary  
55  
56 222 Figure 2 for comparisons across all settings). Consistent with previous findings [15,24,25],  
57  
58 223 PRSice-2 has comparable predictive power to lassosum and LDpred, generating PRS with  
59  
60 224 predictive power higher than that of LDpred but not as high as lassosum. These results are  
61  
62  
63  
64  
65

1  
2  
3  
4 225 inherently dependent on modelling assumptions and we provide these only as an approximate  
5  
6 226 guide of performance in settings that match our assumptions. We provide our simulation code  
7  
8 227 (<https://github.com/choishingwan/PRSice-paper-script>) for others to inspect and repeat our  
9  
10 228 analyses.

11  
12 229  
13  
14 230 While PRS generated by PRSice-2 do not appear to fully optimize predictive accuracy, the  
15  
16 231 simple approach and typically fewer SNPs exploited allows for easier interpretation of the results  
17  
18 232 compared to methods that use all SNPs [26]. Moreover, the efficiency and predictive power of  
19  
20 233 PRSice-2 makes it an ideal tool to perform PRS analyses at scale.

21  
22 234

23  
24  
25 235 **Figure 3**

26  
27 236 *Figure 3 Predictive accuracy of the three PRS software for a simulated trait with heritability  $h^2=0.6$  and target sample size of*  
28 237 *10k. The Y-axis represents the trait variance explained ( $R^2$ ) by the PRS generated from each software, while the X-axis*  
29 238 *corresponds to the number of causal SNPs for the simulated trait. Full results of the comparison study are shown in*  
30 239 *Supplementary Figure 2.*

## 31 32 240 **Discussion**

33  
34  
35 241 We have introduced PRSice-2, a software for the automation of polygenic risk score (PRS)  
36  
37  
38 242 analyses applied to large-scale genotype-phenotype data. Our results demonstrate that PRSice-2 is  
39  
40 243 the most efficient among some of the leading PRS software, outperforming lassosum [15] and  
41  
42 244 LDpred [16]. As data sizes increase and more complicated PRS analyses, such as multi-trait or  
43  
44  
45 245 gene-set based PRS analyses, become common, the efficiency advantages of PRSice-2 will  
46  
47  
48 246 become increasingly important.

49  
50  
51 247  
52  
53 248 Over-fitting is a concern for all approaches to PRS analyses [14]. To control for the Type 1 error  
54  
55  
56 249 rate caused by over-fitting when exploiting PRS for hypothesis testing, PRSice-2 implements the  
57  
58 250 calculation of empirical  $P$ -values.

59  
60  
61  
62  
63  
64  
65

1  
2  
3  
4 251  
5  
6  
7 252 PRSice-2 implements a standard approach for performing PRS analyses. For PRS analyses  
8  
9  
10 253 performed in family data or across diverse populations, for instance, results should be interpreted  
11  
12 254 carefully [14] and extensions of the standard PRS approach or alternatives may be required [14,27–  
13  
14 255 29] to generate more informative results.  
15  
16

17 256  
18  
19  
20

## 21 257 **Availability and requirements**

22  
23

|    |                                                 |                                                     |
|----|-------------------------------------------------|-----------------------------------------------------|
| 24 | <b>Project Name</b>                             | PRSice-2                                            |
| 25 |                                                 |                                                     |
| 26 | <b>Project home page</b>                        | <a href="http://prsice.info">http://prsice.info</a> |
| 27 |                                                 |                                                     |
| 28 | <b>Operating systems</b>                        | Linux (64-bit)                                      |
| 29 |                                                 |                                                     |
| 30 |                                                 | OS X (64-bit Intel)                                 |
| 31 | <b>(pre-compiled versions)</b>                  | Windows (64-bit)                                    |
| 32 |                                                 |                                                     |
| 33 | <b>Programming language</b>                     | C++, R (version 3.2.3+)                             |
| 34 |                                                 |                                                     |
| 35 | <b>Other requirements</b>                       |                                                     |
| 36 | <b>(when recompiling)</b>                       | GCC version 4.8+, zlib                              |
| 37 |                                                 |                                                     |
| 38 |                                                 | GNU General Public License version 3.0              |
| 39 | <b>License</b>                                  | (GPLv3)                                             |
| 40 |                                                 |                                                     |
| 41 | <b>Any restrictions to use by non-academics</b> | None                                                |
| 42 |                                                 |                                                     |
| 43 | <b>RRID</b>                                     | SCR_017057                                          |
| 44 |                                                 |                                                     |
| 45 |                                                 |                                                     |
| 46 |                                                 |                                                     |
| 47 |                                                 |                                                     |
| 48 |                                                 |                                                     |
| 49 |                                                 |                                                     |
| 50 |                                                 |                                                     |
| 51 |                                                 |                                                     |
| 52 |                                                 |                                                     |
| 53 |                                                 |                                                     |
| 54 |                                                 |                                                     |
| 55 |                                                 |                                                     |
| 56 |                                                 |                                                     |
| 57 |                                                 |                                                     |
| 58 |                                                 |                                                     |
| 59 |                                                 |                                                     |
| 60 |                                                 |                                                     |
| 61 |                                                 |                                                     |
| 62 |                                                 |                                                     |
| 63 |                                                 |                                                     |
| 64 |                                                 |                                                     |
| 65 |                                                 |                                                     |



1  
2  
3  
4  
5  
6  
7  
8  
9  
10  
11  
12  
13  
14  
15  
16  
17  
18  
19  
20  
21  
22  
23  
24  
25  
26  
27  
28  
29  
30  
31  
32  
33  
34  
35  
36  
37  
38  
39  
40  
41  
42  
43  
44  
45  
46  
47  
48  
49  
50  
51  
52  
53  
54  
55  
56  
57  
58  
59  
60  
61  
62  
63  
64  
65

258 **Declarations**

259 **Acknowledgements**

260 We thank the participants in the UK Biobank and the scientists involved in the construction of this  
261 resource. This research has been conducted using the UK Biobank Resource under application  
262 18177 (Dr O'Reilly). We thank Hei Man Wu for providing critical feedback regarding this  
263 manuscript and for test running the software. We thank Jonathan Coleman and Kylie Glanville for  
264 the management of the UK Biobank resource at King's College London, and we thank Jack  
265 Euesden for his work on PRSice, which forms the basis of the current software. We thank  
266 Christopher Hübel, Eva Krapohl, Kirstin Purves, Jessye Maxwell, Saskia Hagenaars and Yunfeng  
267 Ruan for their help in test running the software. PFO receives funding from the UK Medical  
268 Research Council (MR/N015746/1). SWC is funded from the UK Medical Research Council  
269 (MR/N015746/1). This report represents independent research (part)-funded by the National  
270 Institute for Health Research (NIHR) Biomedical Research Centre at South London and Maudsley  
271 NHS Foundation Trust and King's College London. The views expressed are those of the authors  
272 and not necessarily those of the NHS, the NIHR, or the Department of Health.

273 **Competing Interests**

274 The authors declare that they have no competing interests

275 **Authors' contributions**

276 SWC and PFO designed the software. SWC implemented the software and drafted the manuscript.  
277 PFO provided critical feedback regarding the manuscript and the software development. All  
278 authors read and approved the final manuscript.

## References

1. Mavaddat N, Pharoah PDP, Michailidou K, Tyrer J, Brook MN, Bolla MK, et al. Prediction of Breast Cancer Risk Based on Profiling With Common Genetic Variants. *JNCI J Natl Cancer Inst* [Internet]. 2015 [cited 2017 Jun 13];107. Available from: <https://academic.oup.com/jnci/article/107/5/djv036/891009/Prediction-of-Breast-Cancer-Risk-Based-on>
2. Kuchenbaecker KB, McGuffog L, Barrowdale D, Lee A, Soucy P, Healey S, et al. Evaluation of Polygenic Risk Scores for Breast and Ovarian Cancer Risk Prediction in BRCA1 and BRCA2 Mutation Carriers. *JNCI J Natl Cancer Inst* [Internet]. 2017 [cited 2018 Sep 26];109. Available from: <https://www.ncbi.nlm.nih.gov/pmc/articles/PMC5408990/>
3. Natarajan P, Young R, Stitzel NO, Padmanabhan S, Baber U, Mehran R, et al. Polygenic Risk Score Identifies Subgroup with Higher Burden of Atherosclerosis and Greater Relative Benefit from Statin Therapy in the Primary Prevention Setting. *Circulation*. 2017;CIRCULATIONAHA.116.024436.
4. Udler MS, Kim J, Grotthuss M von, Bonas-Guarch S, Mercader JM, Cole JB, et al. Clustering of Type 2 Diabetes Genetic Loci by Multi-Trait Associations Identifies Disease Mechanisms and Subtypes. *bioRxiv*. 2018;319509.
5. Krapohl E, Euesden J, Zabaneh D, Pingault J-B, Rimfeld K, von Stumm S, et al. Phenome-wide analysis of genome-wide polygenic scores. *Mol Psychiatry*. 2016;21:1188–93.
6. Krapohl E, Patel H, Newhouse S, Curtis CJ, Stumm S von, Dale PS, et al. Multi-polygenic score approach to trait prediction. *Mol Psychiatry*. 2018;23:1368–74.
7. Selzam S, Krapohl E, von Stumm S, O'Reilly PF, Rimfeld K, Kovas Y, et al. Predicting educational achievement from DNA. *Mol Psychiatry*. 2017;22:267–72.
8. Selzam S, Dale PS, Wagner RK, DeFries JC, Cederlöf M, O'Reilly PF, et al. Genome-Wide Polygenic Scores Predict Reading Performance Throughout the School Years. *Sci Stud Read*. 2017;21:334–49.
9. Du Rietz E, Coleman J, Glanville K, Choi SW, O'Reilly PF, Kuntsi J. Association of Polygenic Risk for Attention-Deficit/Hyperactivity Disorder With Co-occurring Traits and Disorders. *Biol Psychiatry Cogn Neurosci Neuroimaging*. 2018;3:635–43.
10. Sudlow C, Gallacher J, Allen N, Beral V, Burton P, Danesh J, et al. UK Biobank: An Open Access Resource for Identifying the Causes of a Wide Range of Complex Diseases of Middle and Old Age. *PLOS Med*. 2015;12:e1001779.
11. Danciu I, Cowan JD, Basford M, Wang X, Saip A, Osgood S, et al. Secondary use of clinical data: The Vanderbilt approach. *J Biomed Inform*. 2014;52:28–35.

1  
2  
3  
4 313 12. Kaiser J. NIH's 1-million-volunteer precision medicine study announces first pilot projects.  
5 314 Science [Internet]. 2016 [cited 2018 Nov 15]; Available from:  
6 315 [https://www.sciencemag.org/news/2016/02/nih-s-1-million-volunteer-precision-medicine-study-](https://www.sciencemag.org/news/2016/02/nih-s-1-million-volunteer-precision-medicine-study-announces-first-pilot-projects)  
7 316 [announces-first-pilot-projects](https://www.sciencemag.org/news/2016/02/nih-s-1-million-volunteer-precision-medicine-study-announces-first-pilot-projects)  
8  
9  
10 317 13. Euesden J, Lewis CM, O'Reilly PF. PRSice: Polygenic Risk Score software. *Bioinformatics*.  
11 318 2015;31:1466–8.  
12  
13  
14 319 14. Choi SW, Mak TSH, O'Reilly P. A guide to performing Polygenic Risk Score analyses.  
15 320 *bioRxiv*. 2018;416545.  
16  
17 321 15. Mak TSH, Porsch RM, Choi SW, Zhou X, Sham PC. Polygenic scores via penalized  
18 322 regression on summary statistics. *Genet Epidemiol*. 2017;41:469–80.  
19  
20  
21 323 16. Vilhjálmsson BJ, Yang J, Finucane HK, Gusev A, Lindström S, Ripke S, et al. Modeling  
22 324 Linkage Disequilibrium Increases Accuracy of Polygenic Risk Scores. *Am J Hum Genet*.  
23 325 2015;97:576–92.  
24  
25 326 17. Chang CC, Chow CC, Tellier LC, Vattikuti S, Purcell SM, Lee JJ. Second-generation  
26 327 PLINK: rising to the challenge of larger and richer datasets. *GigaScience*. 2015;4:7.  
28  
29 328 18. Wray NR, Lee SH, Mehta D, Vinkhuyzen AAE, Dudbridge F, Middeldorp CM. Research  
30 329 review: Polygenic methods and their application to psychiatric traits. *J Child Psychol Psychiatry*.  
31 330 2014;55:1068–87.  
32  
33  
34 331 19. Li Y, Willer C, Sanna S, Abecasis G. Genotype Imputation. *Annu Rev Genomics Hum*  
35 332 *Genet*. 2009;10:387–406.  
36  
37 333 20. Wood AR, Esko T, Yang J, Vedantam S, Pers TH, Gustafsson S, et al. Defining the role of  
38 334 common variation in the genomic and biological architecture of adult human height. *Nat Genet*.  
39 335 2014;46:1173–86.  
40  
41  
42 336 21. Locke AE, Kahali B, Berndt SI, Justice AE, Pers TH, Day FR, et al. Genetic studies of body  
43 337 mass index yield new insights for obesity biology. *Nature*. 2015;518:197–206.  
44  
45 338 22. North BV, Curtis D, Sham PC. A Note on the Calculation of Empirical P Values from Monte  
46 339 Carlo Procedures. *Am J Hum Genet*. 2002;71:439–41.  
47  
48  
49 340 23. Hagenaars SP, Harris SE, Davies G, Hill WD, Liewald DCM, Ritchie SJ, et al. Shared  
50 341 genetic aetiology between cognitive functions and physical and mental health in UK Biobank  
51 342 (N=112 151) and 24 GWAS consortia. *Mol Psychiatry*. 2016;21:1624–32.  
52  
53  
54 343 24. Allegrini A, Selzam S, Rimfeld K, Stumm S von, Pingault J-B, Plomin R. Genomic  
55 344 prediction of cognitive traits in childhood and adolescence. *bioRxiv*. 2018;418210.  
56  
57 345 25. Ge T, Chen C-Y, Ni Y, Feng Y-CA, Smoller JW. Polygenic Prediction via Bayesian  
58 346 Regression and Continuous Shrinkage Priors. *bioRxiv*. 2018;416859.  
59  
60  
61  
62  
63  
64  
65

1  
2  
3  
4  
5  
6  
7  
8  
9  
10  
11  
12  
13  
14  
15  
16  
17  
18  
19  
20  
21  
22  
23  
24  
25  
26  
27  
28  
29  
30  
31  
32  
33  
34  
35  
36  
37  
38  
39  
40  
41  
42  
43  
44  
45  
46  
47  
48  
49  
50  
51  
52  
53  
54  
55  
56  
57  
58  
59  
60  
61  
62  
63  
64  
65

347 26. Janssens ACJW, Joyner MJ. Polygenic Risk Scores That Predict Common Diseases Using  
348 Millions of Single Nucleotide Polymorphisms: Is More, Better? Clin Chem.  
349 2019;clinchem.2018.296103.

350 27. Duncan L, Shen H, Gelaye B, Ressler K, Feldman M, Peterson R, et al. Analysis of  
351 Polygenic Score Usage and Performance across Diverse Human Populations. bioRxiv.  
352 2018;398396.

353 28. Márquez- Luna C, Loh P-R, Price AL. Multiethnic polygenic risk scores improve risk  
354 prediction in diverse populations. Genet Epidemiol. 2017;41:811–23.

355 29. Martin AR, Gignoux CR, Walters RK, Wojcik GL, Neale BM, Gravel S, et al. Human  
356 Demographic History Impacts Genetic Risk Prediction across Diverse Populations. Am J Hum  
357 Genet. 2017;100:635–49.

358

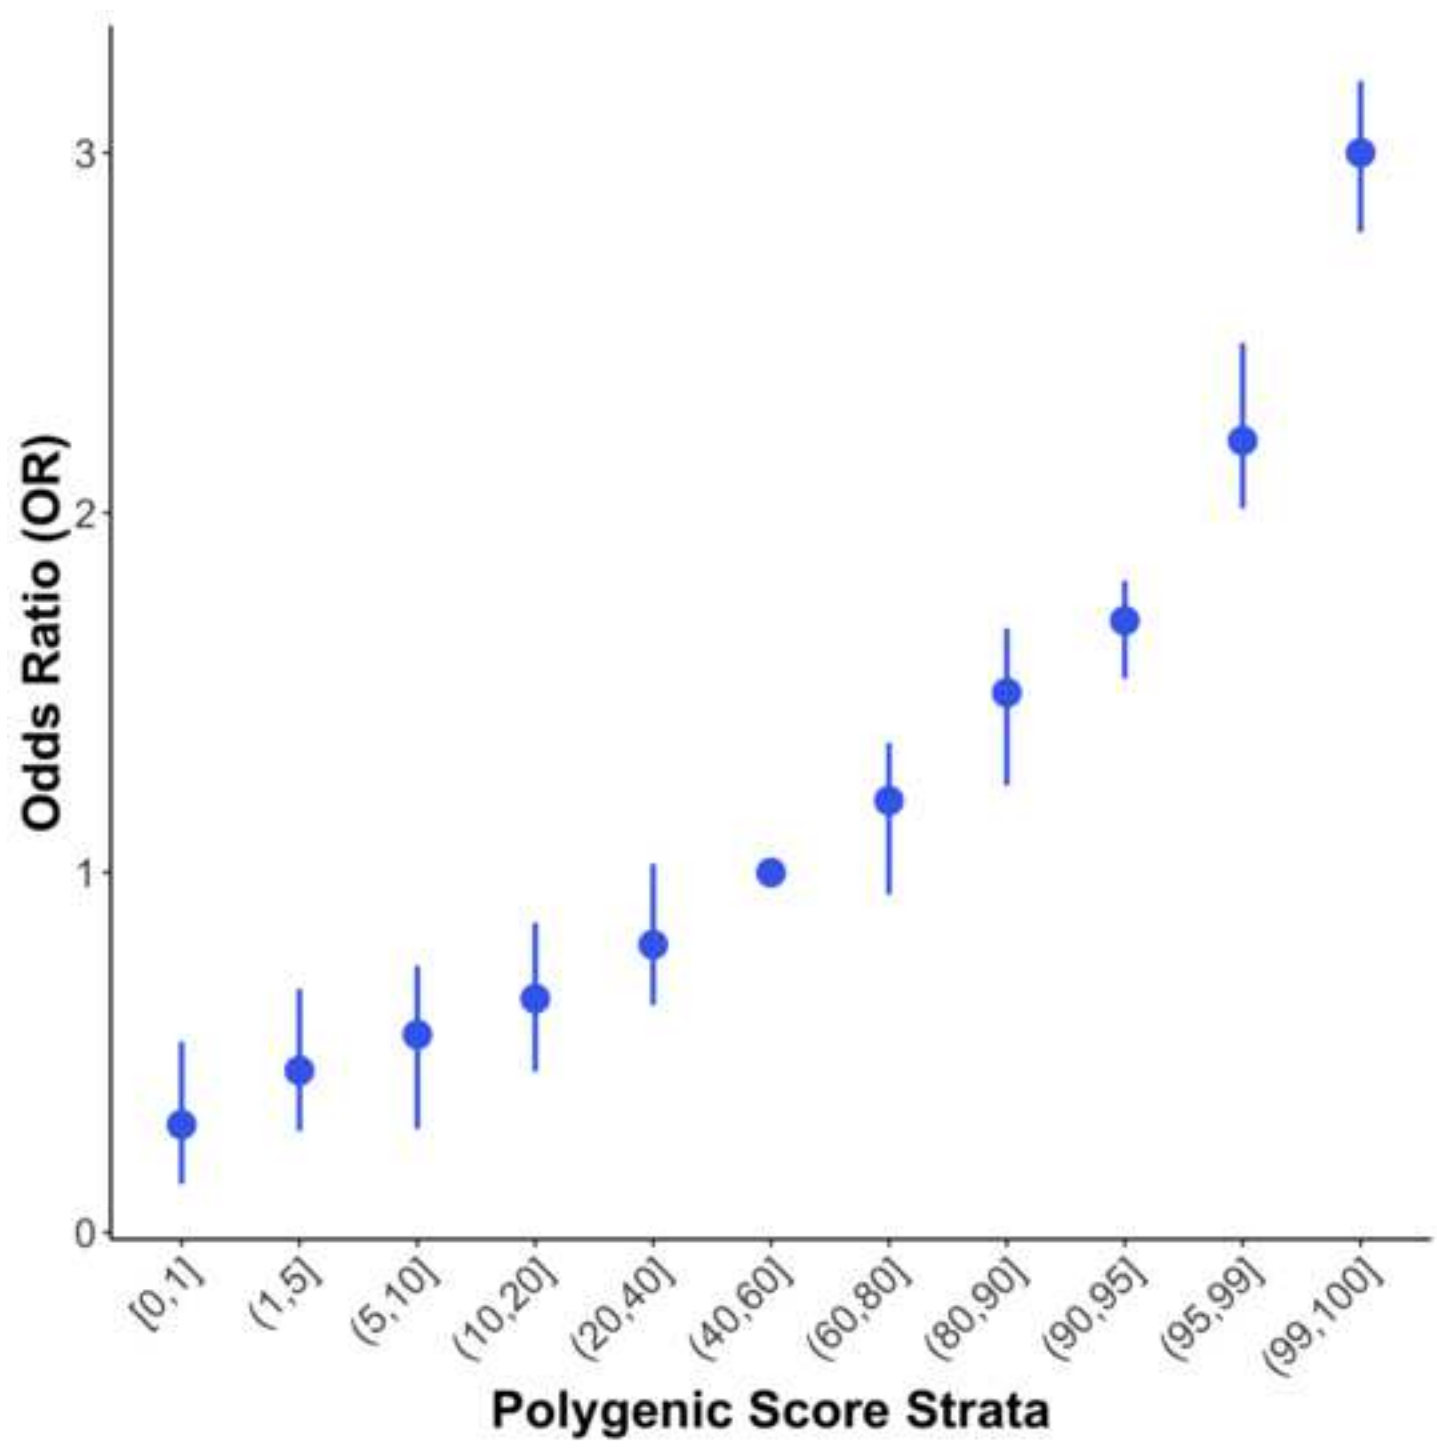

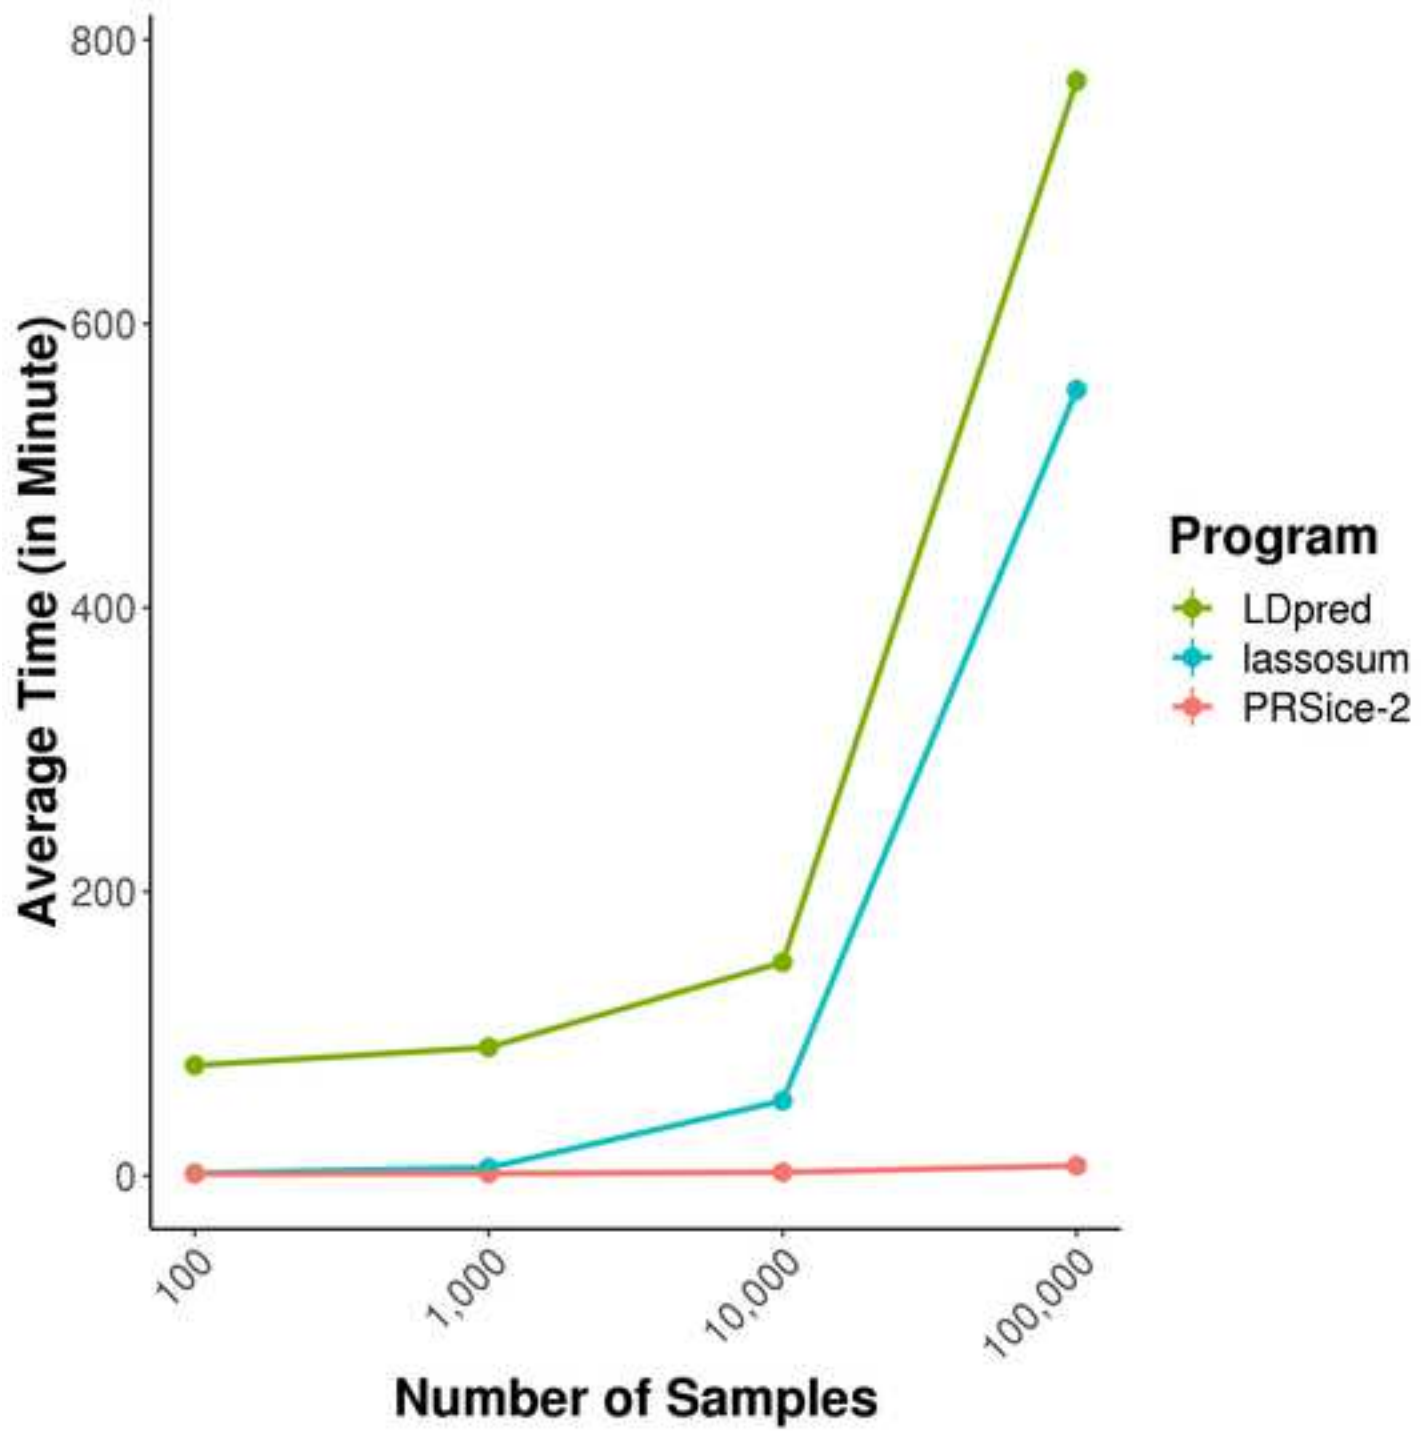

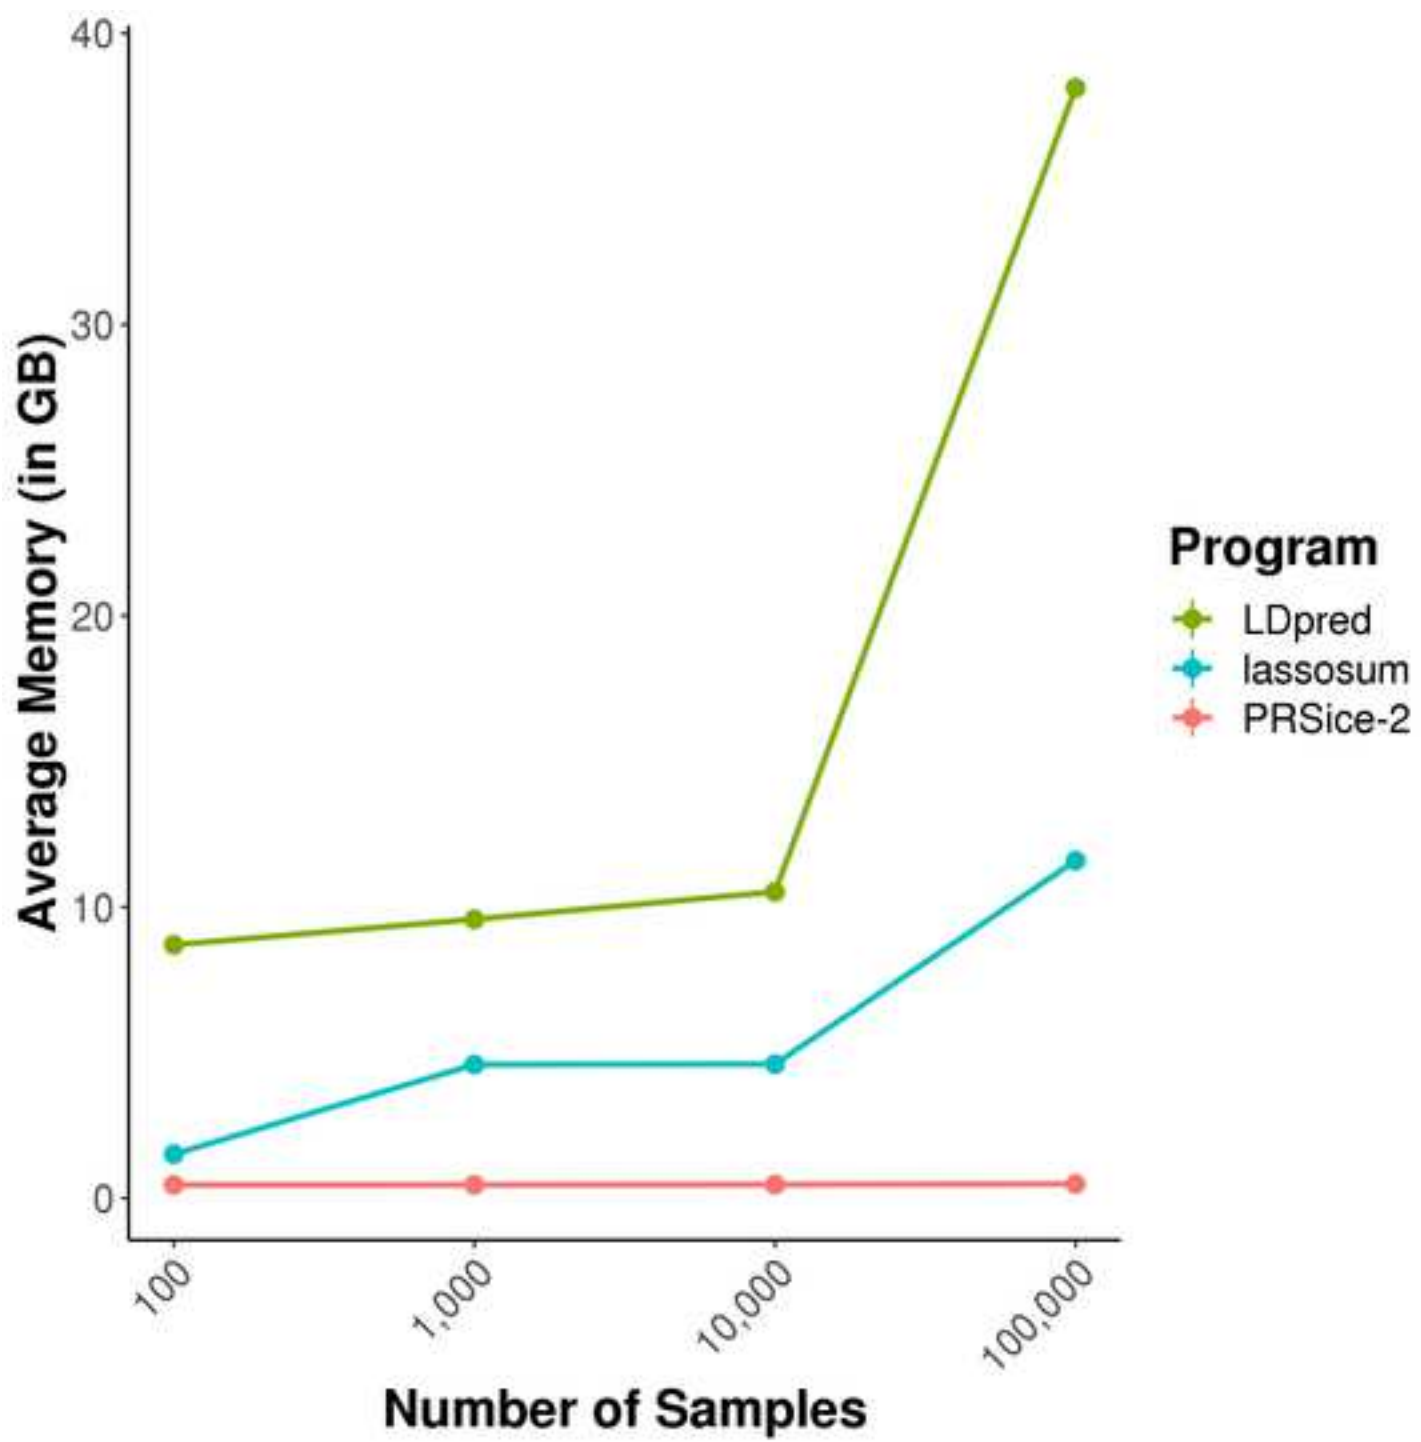

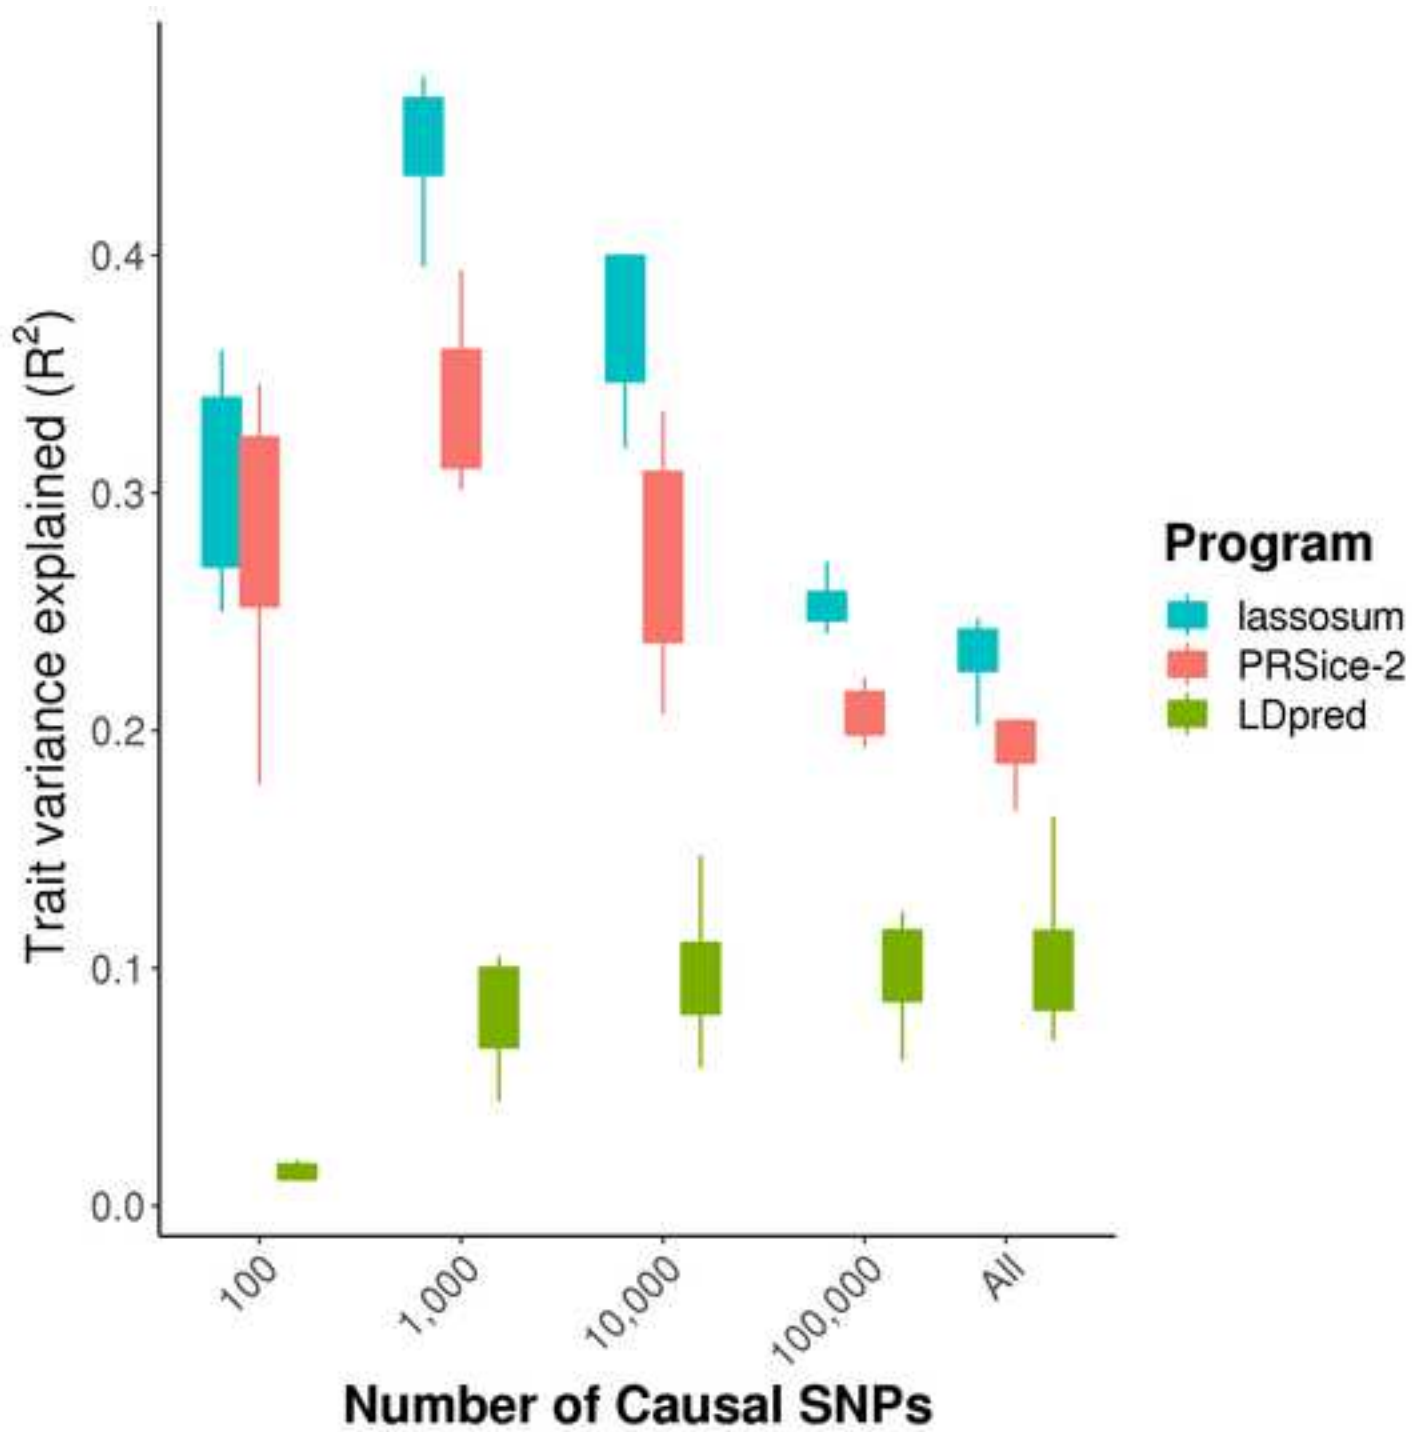



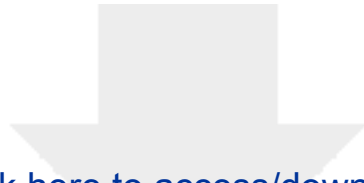

[Click here to access/download](#)

**Supplementary Material**

20190313-PRSize2 Supplementary.docx

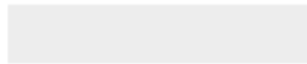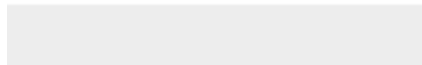

MRC Social, Genetic &  
Developmental Psychiatry Centre  
Director Francesca Happé

16 De Crespigny Park  
Denmark Hill  
London SE5 8AF

Dr Shing Wan Choi  
Email: [shing\\_wan.choi@kcl.ac.uk](mailto:shing_wan.choi@kcl.ac.uk)  
Telephone: +44 (0)7729246486

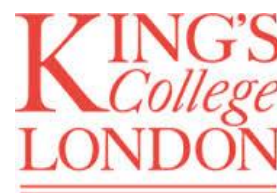

***PRSice-2: Polygenic Risk Score Analysis Software for Large-Scale Data*** (For submission as a Technical Note)

13<sup>th</sup> March 2019

Dear Editor

Thank you for the letter dated 16<sup>th</sup> Jan 2019. The reviewers' comments are insightful and have helped to guide us to improve our paper. Enclosed is the latest version of our manuscript "PRSice-2: Polygenic Risk Score Analysis Software for Large-Scale Data" (GIGA-D-18-00468).

In this revision, we have included a comparison of the performance of polygenic risk scores computed using genotyped data only, using imputed SNP probabilities and from best-guess genotypes in the UKBB genotype data. We have also performed a comprehensive simulation study to compare the runtime, memory burden and predictive accuracy of PRSice-2 to leading alternatives lassosum and LDpred. We also included runtime/memory comparisons between PRSice-2 and PRSice-v1.25 and revised the main text in a number of areas according to reviewer suggestions.

We believe that our updated manuscript addresses all the concerns raised by the reviewers and is a much-improved piece of work for it. We hope that our paper is now suitable for publication in GigaScience as a 'Technical Note'. We look forward to hearing back from you on this.

Shing Wan Choi (cc'ed Paul F. O'Reilly)
