# Supplementary material for: PRSice-2: Polygenic Risk Score software for biobank-scale data
Source: PubMed Central journal article supplement (PMC6629542; doi:10.1093/gigascience/giz082), 2019-07-15
Supplement: giz082_giga-d-18-00468_revision_2.pdf [file giz082_giga-d-18-00468_revision_2.pdf]

|                                                      |                                                                                                                                                                                                                                                                                                                                                                                                                                                                                                                                                                                                                                                                                                                                                                                                                                                                                                                                                                                                                                                                                                                                                                                                                                                                                                                                                                                                                                                                                                                                                                                                                                                                                                                  |                                         |
|------------------------------------------------------|------------------------------------------------------------------------------------------------------------------------------------------------------------------------------------------------------------------------------------------------------------------------------------------------------------------------------------------------------------------------------------------------------------------------------------------------------------------------------------------------------------------------------------------------------------------------------------------------------------------------------------------------------------------------------------------------------------------------------------------------------------------------------------------------------------------------------------------------------------------------------------------------------------------------------------------------------------------------------------------------------------------------------------------------------------------------------------------------------------------------------------------------------------------------------------------------------------------------------------------------------------------------------------------------------------------------------------------------------------------------------------------------------------------------------------------------------------------------------------------------------------------------------------------------------------------------------------------------------------------------------------------------------------------------------------------------------------------|-----------------------------------------|
| <b>Manuscript Number:</b>                            | GIGA-D-18-00468R2                                                                                                                                                                                                                                                                                                                                                                                                                                                                                                                                                                                                                                                                                                                                                                                                                                                                                                                                                                                                                                                                                                                                                                                                                                                                                                                                                                                                                                                                                                                                                                                                                                                                                                |                                         |
| <b>Full Title:</b>                                   | PRSice-2: Polygenic Risk Score software for biobank-scale data                                                                                                                                                                                                                                                                                                                                                                                                                                                                                                                                                                                                                                                                                                                                                                                                                                                                                                                                                                                                                                                                                                                                                                                                                                                                                                                                                                                                                                                                                                                                                                                                                                                   |                                         |
| <b>Article Type:</b>                                 | Technical Note                                                                                                                                                                                                                                                                                                                                                                                                                                                                                                                                                                                                                                                                                                                                                                                                                                                                                                                                                                                                                                                                                                                                                                                                                                                                                                                                                                                                                                                                                                                                                                                                                                                                                                   |                                         |
| <b>Funding Information:</b>                          | UK Medical Research Council<br>(MR/N015746/1)                                                                                                                                                                                                                                                                                                                                                                                                                                                                                                                                                                                                                                                                                                                                                                                                                                                                                                                                                                                                                                                                                                                                                                                                                                                                                                                                                                                                                                                                                                                                                                                                                                                                    | Dr Shing Wan Choi<br>Dr Paul F O'Reilly |
| <b>Abstract:</b>                                     | <p><b>Background</b></p> <p>Polygenic Risk Score (PRS) analyses have become an integral part of biomedical research, exploited to gain insights into shared aetiology among traits, to control for genomic profile in experimental studies, and to strengthen causal inference, among a range of applications. Substantial efforts are now devoted to biobank projects to collect large genetic and phenotypic data, providing unprecedented opportunity for genetic discovery and applications. To process the large-scale data provided by such biobank resources, highly efficient and scalable methods and software are required.</p> <p><b>Method</b></p> <p>Here we introduce PRSice-2, an efficient and scalable software for automating and simplifying polygenic risk score analyses on large-scale data. PRSice-2 handles both genotyped and imputed data, provides empirical association P-values free from inflation due to overfitting, supports different inheritance models and can evaluate multiple continuous and binary target traits simultaneously. We demonstrate that PRSice-2 is dramatically faster and more memory-efficient than PRSice-1 and alternative polygenic score software, LDpred and lassosum, while having comparable predictive power. This combination of efficiency and power will be increasingly important as data sizes grow and as the applications of PRS become more sophisticated; for example, when incorporated into high-dimensional or gene-set based analyses.</p> <p><b>Conclusion</b></p> <p>PRSice-2 is written in C++, with an R script for plotting, and is freely available for download from <a href="http://PRSice.info">http://PRSice.info</a></p> |                                         |
| <b>Corresponding Author:</b>                         | Shing Wan Choi<br>King's College London<br>London, UNITED KINGDOM                                                                                                                                                                                                                                                                                                                                                                                                                                                                                                                                                                                                                                                                                                                                                                                                                                                                                                                                                                                                                                                                                                                                                                                                                                                                                                                                                                                                                                                                                                                                                                                                                                                |                                         |
| <b>Corresponding Author Secondary Information:</b>   |                                                                                                                                                                                                                                                                                                                                                                                                                                                                                                                                                                                                                                                                                                                                                                                                                                                                                                                                                                                                                                                                                                                                                                                                                                                                                                                                                                                                                                                                                                                                                                                                                                                                                                                  |                                         |
| <b>Corresponding Author's Institution:</b>           | King's College London                                                                                                                                                                                                                                                                                                                                                                                                                                                                                                                                                                                                                                                                                                                                                                                                                                                                                                                                                                                                                                                                                                                                                                                                                                                                                                                                                                                                                                                                                                                                                                                                                                                                                            |                                         |
| <b>Corresponding Author's Secondary Institution:</b> |                                                                                                                                                                                                                                                                                                                                                                                                                                                                                                                                                                                                                                                                                                                                                                                                                                                                                                                                                                                                                                                                                                                                                                                                                                                                                                                                                                                                                                                                                                                                                                                                                                                                                                                  |                                         |
| <b>First Author:</b>                                 | Shing Wan Choi                                                                                                                                                                                                                                                                                                                                                                                                                                                                                                                                                                                                                                                                                                                                                                                                                                                                                                                                                                                                                                                                                                                                                                                                                                                                                                                                                                                                                                                                                                                                                                                                                                                                                                   |                                         |
| <b>First Author Secondary Information:</b>           |                                                                                                                                                                                                                                                                                                                                                                                                                                                                                                                                                                                                                                                                                                                                                                                                                                                                                                                                                                                                                                                                                                                                                                                                                                                                                                                                                                                                                                                                                                                                                                                                                                                                                                                  |                                         |
| <b>Order of Authors:</b>                             | Shing Wan Choi<br>Paul F O'Reilly                                                                                                                                                                                                                                                                                                                                                                                                                                                                                                                                                                                                                                                                                                                                                                                                                                                                                                                                                                                                                                                                                                                                                                                                                                                                                                                                                                                                                                                                                                                                                                                                                                                                                |                                         |
| <b>Order of Authors Secondary Information:</b>       |                                                                                                                                                                                                                                                                                                                                                                                                                                                                                                                                                                                                                                                                                                                                                                                                                                                                                                                                                                                                                                                                                                                                                                                                                                                                                                                                                                                                                                                                                                                                                                                                                                                                                                                  |                                         |
| <b>Response to Reviewers:</b>                        | We contacted the first author of LDpred, Dr Bjarni Vilhjalmsson. He informed us that LDpred can become sensitive to small deviations in LD estimates when there are large sample sizes in application to a trait with high heritability. We also noted that there is a                                                                                                                                                                                                                                                                                                                                                                                                                                                                                                                                                                                                                                                                                                                                                                                                                                                                                                                                                                                                                                                                                                                                                                                                                                                                                                                                                                                                                                           |                                         |

|                                                                                                                                                                                                                                                                                                                                                                                                                                                                                                                                     |                                                                                                                                                                                                                                                                                                                                                                                                                                                                                                                                                                                                                                       |
|-------------------------------------------------------------------------------------------------------------------------------------------------------------------------------------------------------------------------------------------------------------------------------------------------------------------------------------------------------------------------------------------------------------------------------------------------------------------------------------------------------------------------------------|---------------------------------------------------------------------------------------------------------------------------------------------------------------------------------------------------------------------------------------------------------------------------------------------------------------------------------------------------------------------------------------------------------------------------------------------------------------------------------------------------------------------------------------------------------------------------------------------------------------------------------------|
|                                                                                                                                                                                                                                                                                                                                                                                                                                                                                                                                     | <p>new version of LDpred (v1.0.6) now available. Repeating our analyses using a smaller base sample size of 50000, and using the latest version of LDpred, we noted that the performance of LDpred substantially improved. As a result of this, we repeated our entire analyses using the latest versions of PRSice-2 and LDpred and have updated our results accordingly. The overall results remain qualitatively unchanged: PRSice-2 is still markedly the fastest PRS program (more so than previously) and it has comparable power to lassosum and LDpred, with predictive power higher than LDpred and lower than lassosum.</p> |
| <b>Additional Information:</b>                                                                                                                                                                                                                                                                                                                                                                                                                                                                                                      |                                                                                                                                                                                                                                                                                                                                                                                                                                                                                                                                                                                                                                       |
| <b>Question</b>                                                                                                                                                                                                                                                                                                                                                                                                                                                                                                                     | <b>Response</b>                                                                                                                                                                                                                                                                                                                                                                                                                                                                                                                                                                                                                       |
| Are you submitting this manuscript to a special series or article collection?                                                                                                                                                                                                                                                                                                                                                                                                                                                       | No                                                                                                                                                                                                                                                                                                                                                                                                                                                                                                                                                                                                                                    |
| <p><b>Experimental design and statistics</b></p> <p>Full details of the experimental design and statistical methods used should be given in the Methods section, as detailed in our <a href="#">Minimum Standards Reporting Checklist</a>. Information essential to interpreting the data presented should be made available in the figure legends.</p> <p>Have you included all the information requested in your manuscript?</p>                                                                                                  | Yes                                                                                                                                                                                                                                                                                                                                                                                                                                                                                                                                                                                                                                   |
| <p><b>Resources</b></p> <p>A description of all resources used, including antibodies, cell lines, animals and software tools, with enough information to allow them to be uniquely identified, should be included in the Methods section. Authors are strongly encouraged to cite <a href="#">Research Resource Identifiers</a> (RRIDs) for antibodies, model organisms and tools, where possible.</p> <p>Have you included the information requested as detailed in our <a href="#">Minimum Standards Reporting Checklist</a>?</p> | Yes                                                                                                                                                                                                                                                                                                                                                                                                                                                                                                                                                                                                                                   |
| <p><b>Availability of data and materials</b></p> <p>All datasets and code on which the conclusions of the paper rely must be either included in your submission or</p>                                                                                                                                                                                                                                                                                                                                                              | Yes                                                                                                                                                                                                                                                                                                                                                                                                                                                                                                                                                                                                                                   |

deposited in [publicly available repositories](#) (where available and ethically appropriate), referencing such data using a unique identifier in the references and in the “Availability of Data and Materials” section of your manuscript.

Have you have met the above requirement as detailed in our [Minimum Standards Reporting Checklist](#)?

[Click here to view linked References](#)

# 1 PRSice-2: Polygenic Risk Score software 2 for biobank-scale data

3 Shing Wan Choi<sup>1,2\*</sup> and Paul O'Reilly<sup>1,2\*</sup>

4 *1 MRC Social, Genetic and Developmental Psychiatry Centre, Institute of Psychiatry,*  
5 *Psychology and Neuroscience, King's College London, London, United Kingdom*

6 *2 Department of Genetics and Genomic Sciences, Icahn School of Medicine, Mount Sinai,*  
7 *New York City*

8 *\*To whom correspondence should be addressed.*

## 9 **Abstract**

10 **Background:** Polygenic Risk Score (PRS) analyses have become an integral part of biomedical  
11 research, exploited to gain insights into shared aetiology among traits, to control for genomic  
12 profile in experimental studies, and to strengthen causal inference, among a range of applications.  
13 Substantial efforts are now devoted to biobank projects to collect large genetic and phenotypic  
14 data, providing unprecedented opportunity for genetic discovery and applications. To process the  
15 large-scale data provided by such biobank resources, highly efficient and scalable methods and  
16 software are required.

17 **Method:** Here we introduce PRSice-2, an efficient and scalable software for automating and  
18 simplifying polygenic risk score analyses on large-scale data. PRSice-2 handles both genotyped  
19 and imputed data, provides empirical association *P*-values free from inflation due to overfitting,  
20 supports different inheritance models and can evaluate multiple continuous and binary target traits  
21 simultaneously. We demonstrate that PRSice-2 is dramatically faster and more memory-efficient

22 than PRSice-1 and alternative polygenic score software, LDpred and lassosum, while having  
23 comparable predictive power. This combination of efficiency and power will be increasingly  
24 important as data sizes grow and as the applications of PRS become more sophisticated; for  
25 example, when incorporated into high-dimensional or gene-set based analyses.

26 **Conclusion:** PRSice-2 is written in C++, with an R script for plotting, and is freely available for  
27 download from <http://PRSice.info>

28 **Keywords:** Polygenic Risk Score, GWAS, Imputation

29  
30 Polygenic Risk Score (PRS) analyses are beginning to play a critical role in biomedical research,  
31 being already sufficiently powered to provide scientific insights and with the potential to contribute  
32 to stratified medicine in the future [1–9]. The increasing availability of genetic data from regional  
33 and national biobank projects [10–12] have allowed more powerful PRS to be calculated. However,  
34 the calculation of PRS, which involves parameter optimization [13–16], can be a computationally  
35 intensive process, especially for large datasets and when multiple analyses are conducted.

36  
37 To fully utilize the power of large datasets and to facilitate future method and application  
38 developments, at scale, we have performed a major overhaul of our original PRSice software [13],  
39 to produce PRSice-2. All code has been re-written in C++ and code from PLINK-1.9 [17] has been  
40 incorporated to optimize computation. As a result of the consistent language and switch to  
41 objected-oriented code, different analytical components of the code can communicate directly,  
42 without, for example, the generation of intermediate files, such as those containing PRS  
43 corresponding to each  $P$ -value threshold, or post-processed genotype files. This has generated a  
44 substantial speed-up, a lower processing burden and a reduction in disk space requirement in

45 PRSice-2. In addition, a separate plotting script is implemented in R. Separate tasks are organized  
46 into functions and are, thus, more amenable to tailored extensions by users. Finally, a range of  
47 user-options are incorporated into PRSice-2 to increase flexibility and improve usability.

48

## 49 [Features of PRSice-2](#)

50 PRSice-2 utilizes the same standard approach to PRS calculation as PRSice, involving clumping  
51 Single Nucleotide Polymorphisms (SNPs) (thinning SNPs according to linkage disequilibrium and  
52  $P$ -value) and then performing  $P$ -value thresholding, known as the “C+T” method [14], and retains  
53 the majority of the features of its predecessor [13], including automatic strand flipping, clumping  
54 [18], and calculation and evaluation of PRS under few (‘fastscore’) or many (‘high-resolution  
55 scoring’)  $P$ -value thresholds.

56

57 When compared to PRSice, PRSice-2 streamlines the entire PRS analysis pipeline without  
58 generating intermediate files, and performs all the main computations in C++, leading to a drastic  
59 speed-up in runtime and reduction in memory burden (see Supplementary Figure 1). Extraction  
60 and exclusion of samples and SNPs are also implemented, allowing PRS analysis to be performed  
61 directly on a subset of the input data without performing pre-filtering.

62 Briefly, the main features of PRSice-2 are:

- 63 1. Handles large-scale PRS analyses of both genotyped and imputed data
- 64 2. Computes empirical association  $P$ -values to account for over-fitting
- 65 3. Can perform PRS analyses on a large number of target phenotypes simultaneously
- 66 4. Provides several options for imputing missing genotypes

- 67 5. Allows calculation of PRS based on different inheritance models, including additive,  
68 dominant, recessive and heterozygous models
- 69 6. Automatically generates dummy variables for categorical covariates
- 70 7. Can perform regression to estimate relative effect/risk corresponding to samples in user-  
71 defined stratum of the population. Can output quantile and strata plots
- 72 8. Amenable to user extensions, such as relating to input data format, regression modelling  
73 and output

74

#### 75 Handling of Imputed data

76 Genotypes are typically represented as the discrete counts of the minor or effect allele (0, 1 or 2),  
77 for single nucleotide polymorphisms (SNPs), in each individual. Genotypes not included in the  
78 genotyping chip can, potentially, be imputed and are usually either recorded as a set of three  
79 probabilities corresponding to the probability of each of the possible genotypes [19], or based on  
80 these, as the expected genotype (a real number between 0 and 2 known as the “dosage”) [19] or as  
81 the “best-guess” (most probable) genotype. While any of these data formats can be exploited in  
82 PRS analyses, the most common approach is to use the “best-guess” genotype for each individual.  
83 However, this approach does not account for the uncertainty in the imputed genotype.

84

85 Currently, most PRS software only support input of the genotyped format. Therefore, users need  
86 to generate a large intermediate file containing the best-guess genotypes and discard any  
87 information related to imputation uncertainty. To reduce the storage space requirement, and to  
88 incorporate imputation uncertainty into PRS analyses, PRSice-2 implements support for the BGEN  
89 imputation format. PRSice-2 can directly process the BGEN imputed format and either convert to

90 best-guess genotypes or dosages when calculating the PRS, without generating a large intermediate  
91 file. While PRS based on best-guess genotypes are calculated as for genotyped input, dosage based  
92 PRS are calculated as

93

$$PRS = \left( \sum_i^m \beta_i \left( \sum_{j=0}^2 \omega_{ij} \times j \right) \right) \quad (1)$$

94 where  $\omega_{ij}$  is the probability of observing genotype  $j$ , where  $j \in \{0,1,2\}$ , for the  $i^{th}$  SNP,  $m$  is the  
95 number of SNPs and  $\beta_i$  is the effect size of the  $i^{th}$  SNP estimated from the relevant base GWAS  
96 data.

97

98 The ability to perform PRS analyses directly on imputed data can be particularly useful when the  
99 base GWAS and target samples are genotyped on a different platform, as then there can be a small  
100 fraction of overlapping SNPs. For example, of the 725,459 post-QC SNPs (see Supplementary  
101 Material) in the UK Biobank genotype data [10], only 31% (222,956) of those were found in the  
102 GIANT Height and Body Mass Index (BMI) GWAS [20,21]. The use of imputed SNPs increases  
103 the number of overlapping SNPs to 2,121,036 SNPs. To assess the gain in power when using  
104 imputed vs un-imputed data, we performed PRS analyses on height and BMI using UK Biobank  
105 genotyped and imputed data, with GWAS summary statistics provided by the GIANT consortium  
106 [20,21]. Age, sex, UK Biobank genotyping batch, UK Biobank assessment centre and 40 principle  
107 components were first regressed out from the phenotype and the standardized residuals were used  
108 instead.

109



110 We performed a linear regression using PRSice-2, with the UK Biobank data as target sample  
111 using the default parameters. When calculating PRS from the “best-guess” genotype, the “best-  
112 guess” genotype is defined as the genotype having an imputation probability of 0.9 or above. If  
113 there is no such genotype, then the SNP is considered to be missing for the individual. In addition,  
114 for the imputed data, we filtered out SNPs with imputation quality score less than 0.8. With height  
115 as the outcome and PRS for height as predictor, we observed an increase in phenotypic variance  
116 explained ( $R^2$ ) of the PRS from 0.145 when using genotyped data to 0.152 when using best-guess  
117 imputed genotypes, and 0.153 when using dosage data; likewise, the  $R^2$  for BMI increased from  
118 0.0475 when using genotype data to 0.0529 when using best-guess genotypes, and to 0.0535 when  
119 using dosage data. These results exemplify the potential gain in predictive power when using  
120 dosage data compared to using genotyped or best-guess genotype data. However, given the modest  
121 increases in predictive power, users may wish to perform first-pass analyses on genotyped-only  
122 data before application to the more computationally intensive imputed data. A further challenge in  
123 exploiting imputed data is that there are numerous imputed formats in use in the field. While it is  
124 difficult to support all imputed formats, PRSice-2 adopts a modular approach, which allows simple  
125 incorporation of supports for additional data formats (eg. vcf) in the future.

126

#### 127 Calculation of Empirical $P$ -value

128 All approaches to PRS calculation involve parameter optimisation in generating the final  
129 prediction model, and are thus vulnerable to overfitting [14]. The best strategy to avoid overfitting  
130 is to evaluate performance in an independent validation sample, but such a sample is not always  
131 available. Alternatively, if the primary aim is to assess evidence for an association to test a

132 hypothesis, then we can calculate an empirical  $P$ -value corresponding to the association of the  
133 optimized PRS, with the Type 1 error rate controlled [13].

134

135 In PRSice-2, to obtain the empirical  $P$ -value, the target trait values are permuted across the sample  
136 of individuals  $k$  times (default = 10,000) and the PRS analysis is repeated on each set of permuted  
137 phenotypes. Thus, on each permutation, the “best-fit PRS” is obtained as that most associated with  
138 the target trait across the range of  $P$ -value thresholds considered, and the empirical  $P$ -value is  
139 calculated as:

$$\text{empirical } P = \frac{\sum_{n=1}^N I(P_n < P_o) + 1}{N + 1} \quad (2)$$

140 where  $N$  is the number of permutations performed,  $I(\cdot)$  is the indicator function, which takes a  
141 value of 0 if the “best-fit PRS” of permutation  $n$  is smaller than the observed  $P$ -value,  $P_o$ , and  
142 where pseudo-counts of 1 are added to the numerator and denominator to avoid empirical  $P$ -values  
143 of 0 and reflecting (conservatively) counting the observed trait configuration as one potential null  
144 permutation [22]. While the empirical  $P$ -values for association will be controlled for the Type 1  
145 error rate, since the same process of parameter optimisation is performed explicitly under the null  
146 hypothesis, the observed phenotypic variance explained,  $R^2$ , remains unadjusted and is affected by  
147 overfitting. Therefore, it is imperative to perform out-of-sample prediction, or cross-validation, to  
148 evaluate the predictive accuracy of PRS when using PRSice-2, and ideally the former given the  
149 problems of generalisability observed with PRS [14].

150

### 151 Analysis of PRS strata

152 While PRS on most complex traits presently have limited power to accurately predict risk at the  
153 individual-level, which will remain the case for low-moderate heritability traits irrespective of

154 GWAS sample sizes, recent studies have demonstrated that individuals at the tails of PRS  
155 distribution can have substantially higher disease risk than those of the general population. Thus,  
156 these individuals may provide useful subjects for experimental follow-up, while in clinical settings  
157 it could be more efficacious to employ different risk management strategies, in terms of screening  
158 or interventions, for example, for individuals with extreme PRS [1–3].

159  
160 We have implemented a strata analysis feature in PRSice-2 to aid the calculation of relative  
161 phenotypic risk of individuals between strata. Briefly, the  $N$  individuals of the target sample are  
162 first aggregated into  $M$  different strata based on their PRS. An  $N \times (M - 1)$  design matrix is then  
163 generated using dummy coding, such that an individual is coded 1 in the column that corresponds  
164 to their PRS stratum and whereby a user-defined stratum is the reference group (or the median  
165 stratum by default). A linear regression (for quantitative traits) or logistic regression (for binary  
166 traits) will then be performed to estimate the phenotypic difference or relative risk, respectively,  
167 of each stratum versus the reference. The set of corresponding beta-coefficients (linear) or the odds  
168 ratio (logistic), can then be visualized with the strata plot (Figure 1). This allow users to assess  
169 whether individuals in the extreme stratum have a substantially higher phenotypic risk when  
170 compared to the reference stratum.

### 171 Figure 1

172 Figure 1 Strata plot generated by PRSice-2. The X-axis shows the range of different quantiles (eg. (80,90] corresponds to those  
173 individuals with PRS between the 80%-ile – 90%-ile of the population), and the Y-axis shows the odds ratio (OR) when comparing  
174 PRS from different quantiles with the reference quantile (here, (40,60]).

## 175 Benchmarking

176 Here we perform a simulation study to compare the performance of PRSice-2 to alternative  
177 polygenic score software lassosum [15] and LDpred [16], in terms of runtime, memory usage and  
178 predictive power.

179

180 Quantitative traits with heritability ( $h^2$ ) of 0.2 and 0.6 were simulated with the UK Biobank  
181 genotype data (post-QC) as input. Briefly, each quantitative trait was simulated based on the  
182 following linear model:

$$Y = X\beta + \varepsilon \quad (3)$$

183 where  $X$  is the unstandardized genotype matrix corresponding to 385,794 individuals (rows) and  
184 560,173 SNP genotypes (columns). The  $\beta$  vector corresponds to the effect size associated with  
185 each SNP, with 100, 1k, 10k, 100k and 560,173 (all SNPs) randomly selected to be causal SNPs  
186 with effect size  $\beta \sim N(0,1)$ ,  $\beta = 0$  otherwise, and  $\varepsilon$  represents the random error, which follows

187  $\varepsilon \sim N\left(0, \sqrt{\frac{\text{var}(X\beta)(1-h^2)}{h^2}}\right)$ . To control for batch effects and population structure in the genotype

188 data, a regression of batch and 40 PCs against the simulated trait were performed as follows:

$$Y = \text{Batch} + 40 \text{ PCs} + \varepsilon \quad (4)$$

189 The standardized residuals were then used as the final simulated trait. Samples of size 50k and  
190 200k individuals were randomly selected as the base sample and used to generate the GWAS  
191 summary statistics. 100, 1k, 10k and 100k samples independent from the base were then randomly  
192 selected as the target sample. PRS analyses were then performed on these base and target data  
193 using the latest version of lassosum (v0.4.4), LDpred (v1.0.6) and PRSice 2 (v2.2.1), on servers  
194 equipped with 286 Intel 8168 24 core @ 2.7GHz and 192GB of RAM. Default parameters of each  
195 program were used. The runtime and memory usage of each program were measured using the

196 Linux *time* command and the predictive power of the methods was assessed according to  
197 phenotypic variance explained ( $R^2$ ). The entire process was repeated 10 times to obtain an  
198 estimated distribution of runtime, memory usage and predictive power.

199  
200 Figure 2 shows the runtime and memory usage of PRSice-2, lassosum and LDpred. Based on these  
201 simulation results, PRSice-2 is the most efficient software in all settings (Figure 2a), significantly  
202 faster than lassosum ( $P = 1e-58$ , one sided t-test) and LDpred ( $P = 2e-90$ , one sided t-test).  
203 Specifically, PRSice-2 can complete the full PRS analysis on 100k samples within 4 minutes  
204 (Supplementary Table 1), which is 179x faster than the 10 hours required by lassosum, and 241x  
205 faster than the 13 hours 27 minutes required by LDpred. Likewise, PRSice-2 requires significantly  
206 less memory (Figure 2b) than lassosum ( $P = 1e-202$ , one sided t-test) and LDpred ( $P = 9e-112$ ,  
207 one sided t-test), requiring less than 500MB of memory for 100k samples, as opposed to 11.2 GB  
208 required by lassosum and 45.2 GB required by LDpred (Supplementary Table 2). Likewise,  
209 PRSice-2 outperforms PRSice-v1.25, requiring 400x less time and 8x less memory for a target  
210 sample size of 10k (similar memory for small target samples. See Supplementary Figure 1,  
211 Supplementary Tables 1,2 for details). As data size grows, or when more sophisticated PRS  
212 analyses are performed at scale [5,23], these gains in computational efficiency could become even  
213 more important.

214

|           |           |
|-----------|-----------|
| Figure 2a | Figure 2b |
|-----------|-----------|

215 *Figure 2 Performance of the three PRS software on simulated data. a) Average run time (in minutes) required to complete the*  
216 *entire analysis, across 10 repeats, when applied to different sizes of target sample. b) Average memory (in GB) required for the*  
217 *different software to process the different sizes of target sample.*

218 Figure 3 shows the predictive power of PRSice-2 when compared to lassosum and LDpred for  
219 quantitative traits with heritability of 0.2, base sample size of 50k and target sample size of 10k  
220 (see Supplementary Figure 2 for comparisons across all settings). Consistent with previous  
221 findings [15,24,25], PRSice-2 has comparable predictive power to lassosum and LDpred, typically  
222 generating PRS with predictive power higher than that of LDpred but not as high as lassosum.  
223 However, these results are inherently dependent on our modelling assumptions. For example, in  
224 our simulation, effect sizes and residual effects are assumed to have a Gaussian distribution and  
225 all “causal” SNPs are included in the dataset. Thus, we provide these results only as an approximate  
226 guide of performance in settings that match our assumptions. We provide our simulation code  
227 (<https://github.com/choishingwan/PRSice-paper-script>) for others to inspect and repeat our  
228 analyses.

229  
230 While PRS generated by PRSice-2 do not appear to fully optimize predictive accuracy, the simple  
231 approach and typically fewer SNPs exploited allows for easier interpretation of the results  
232 compared to methods that use all SNPs [26]. Moreover, the efficiency and predictive power of  
233 PRSice-2 makes it an ideal tool to perform PRS analyses at scale.

234  
235 **Figure 3**  
236 *Figure 3 Predictive accuracy of the three PRS software for a simulated trait with heritability  $h^2=0.2$ , target sample size of 10k*  
237 *and base sample size of 50k. The three programs were run using their default parameter settings. The Y-axis represents the trait*  
238 *variance explained ( $R^2$ ) by the PRS generated from each software, while the X-axis corresponds to the number of causal SNPs*  
239 *for the simulated trait. Full results of the comparison study are shown in Supplementary Figure 2.*

## 240 **Discussion**

241 We have introduced PRSice-2, a software for the automation of polygenic risk score (PRS)  
242 analyses applied to large-scale genotype-phenotype data. Our results demonstrate that PRSice-2 is  
243 the most efficient among the leading PRS software, outperforming lassosum [15] and LDpred [16].

244 As data sizes increase and more sophisticated PRS analyses, such as multi-trait or gene-set based  
245 PRS analyses, become common, the efficiency advantages of PRSice-2 will become increasingly  
246 important.

247

248 Over-fitting is a concern for all approaches to PRS analyses [14]. To control for the Type 1 error  
249 rate caused by over-fitting when exploiting PRS for hypothesis testing, PRSice-2 implements the  
250 calculation of empirical  $P$ -values.

251

252 PRSice-2 implements a standard approach for performing PRS analyses. For PRS analyses  
253 performed in family data or across diverse populations, for instance, results should be interpreted  
254 carefully [14] and extensions of the standard PRS approach or alternatives may be required [14,27–  
255 29] to generate more informative results.

256

## 257 **Availability and requirements**

|                                |                                                     |
|--------------------------------|-----------------------------------------------------|
| <b>Project Name</b>            | PRSice-2                                            |
| <b>Project home page</b>       | <a href="http://prsice.info">http://prsice.info</a> |
| <b>Operating systems</b>       | Linux (64-bit)                                      |
| <b>(pre-compiled versions)</b> | OS X (64-bit Intel)                                 |
|                                | Windows (64-bit)                                    |
| <b>Programming language</b>    | C++, R (version 3.2.3+)                             |
| <b>Other requirements</b>      |                                                     |
| <b>(when recompiling)</b>      | GCC version 4.8+, zlib                              |

|                                                 |                                                   |
|-------------------------------------------------|---------------------------------------------------|
| <b>License</b>                                  | GNU General Public License version 3.0<br>(GPLv3) |
| <b>Any restrictions to use by non-academics</b> | None                                              |
| <b>RRID</b>                                     | SCR_017057                                        |

## 258 **Availability of Supporting Data**

259 Data further supporting this work and snapshots of the code are available in the *GigaScience*  
260 repository, GigaDB [30].

## 261 **Declarations**

### 262 [Abbreviations](#)

263 BMI: Body Mass Index; GWAS: Genome Wide Association Study; SNP: Single Nucleotide  
264 Polymorphism; PRS: Polygenic Risk Score

### 265 [Competing Interests](#)

266 The authors declare that they have no competing interests

### 267 [Funding](#)

268 Medical Research Council FundRef identification ID: <http://dx.doi.org/10.13039/501100000265>  
269 [MR/N015746/1](#) to Paul F. O'Reilly

270

### 271 [Authors' contributions](#)

272 Conceptualization, SWC and PFO; Methodology, SWC and PFO; Investigation, SWC; Software,  
273 SWC; Supervision, PFO; Funding Acquisition, PFO; Writing - Original Draft, SWC; Writing -  
274 Review & Editing, SWC and PFO.

275

### 276 [Acknowledgements](#)

277 We thank the participants in the UK Biobank and the scientists involved in the construction of this  
278 resource. This research has been conducted using the UK Biobank Resource under application



279 18177 (Dr O'Reilly). We thank Hei Man Wu for providing critical feedback regarding this  
280 manuscript and for test running the software. We thank Jonathan Coleman and Kylie Glanville for  
281 the management of the UK Biobank resource at King's College London, and we thank Jack  
282 Euesden for his work on PRSice, which forms the basis of the current software. We thank  
283 Christopher Hübel, Eva Krapohl, Kirstin Purves, Jessye Maxwell, Saskia Hagenaars and Yunfeng  
284 Ruan for their help in test running the software. This work was supported in part through the  
285 computational resources and staff expertise provided by the Department of Scientific Computing  
286 at the Icahn School of Medicine at Mount Sinai. PFO receives funding from the UK Medical  
287 Research Council (MR/N015746/1). SWC is funded from the UK Medical Research Council  
288 (MR/N015746/1). This report represents independent research (part)-funded by the National  
289 Institute for Health Research (NIHR) Biomedical Research Centre at South London and Maudsley  
290 NHS Foundation Trust and King's College London. The views expressed are those of the authors  
291 and not necessarily those of the NHS, the NIHR, or the Department of Health.

## 292 **References**

- 293 1. Mavaddat N, Pharoah PDP, Michailidou K, Tyrer J, Brook MN, Bolla MK, et al. Prediction  
294 of Breast Cancer Risk Based on Profiling With Common Genetic Variants. *JNCI J Natl Cancer*  
295 *Inst* [Internet]. 2015 [cited 2017 Jun 13];107. Available from:  
296 [https://academic.oup.com/jnci/article/107/5/djv036/891009/Prediction-of-Breast-Cancer-Risk-](https://academic.oup.com/jnci/article/107/5/djv036/891009/Prediction-of-Breast-Cancer-Risk-Based-on)  
297 [Based-on](https://academic.oup.com/jnci/article/107/5/djv036/891009/Prediction-of-Breast-Cancer-Risk-Based-on)
- 298 2. Kuchenbaecker KB, McGuffog L, Barrowdale D, Lee A, Soucy P, Healey S, et al. Evaluation  
299 of Polygenic Risk Scores for Breast and Ovarian Cancer Risk Prediction in BRCA1 and BRCA2  
300 Mutation Carriers. *JNCI J Natl Cancer Inst* [Internet]. 2017 [cited 2018 Sep 26];109. Available  
301 from: <https://www.ncbi.nlm.nih.gov/pmc/articles/PMC5408990/>
- 302 3. Natarajan P, Young R, Stitzel NO, Padmanabhan S, Baber U, Mehran R, et al. Polygenic Risk  
303 Score Identifies Subgroup with Higher Burden of Atherosclerosis and Greater Relative Benefit  
304 from Statin Therapy in the Primary Prevention Setting. *Circulation*.  
305 2017;CIRCULATIONAHA.116.024436.

- 306 4. Udler MS, Kim J, Grotthuss M von, Bonas-Guarch S, Mercader JM, Cole JB, et al. Clustering  
307 of Type 2 Diabetes Genetic Loci by Multi-Trait Associations Identifies Disease Mechanisms and  
308 Subtypes. *bioRxiv*. 2018;319509.
- 309 5. Krapohl E, Euesden J, Zabaneh D, Pingault J-B, Rimfeld K, von Stumm S, et al. Phenome-  
310 wide analysis of genome-wide polygenic scores. *Mol Psychiatry*. 2016;21:1188–93.
- 311 6. Krapohl E, Patel H, Newhouse S, Curtis CJ, Stumm S von, Dale PS, et al. Multi-polygenic  
312 score approach to trait prediction. *Mol Psychiatry*. 2018;23:1368–74.
- 313 7. Selzam S, Krapohl E, von Stumm S, O’Reilly PF, Rimfeld K, Kovas Y, et al. Predicting  
314 educational achievement from DNA. *Mol Psychiatry*. 2017;22:267–72.
- 315 8. Selzam S, Dale PS, Wagner RK, DeFries JC, Cederlöf M, O’Reilly PF, et al. Genome-Wide  
316 Polygenic Scores Predict Reading Performance Throughout the School Years. *Sci Stud Read*.  
317 2017;21:334–49.
- 318 9. Du Rietz E, Coleman J, Glanville K, Choi SW, O’Reilly PF, Kuntsi J. Association of  
319 Polygenic Risk for Attention-Deficit/Hyperactivity Disorder With Co-occurring Traits and  
320 Disorders. *Biol Psychiatry Cogn Neurosci Neuroimaging*. 2018;3:635–43.
- 321 10. Sudlow C, Gallacher J, Allen N, Beral V, Burton P, Danesh J, et al. UK Biobank: An Open  
322 Access Resource for Identifying the Causes of a Wide Range of Complex Diseases of Middle  
323 and Old Age. *PLOS Med*. 2015;12:e1001779.
- 324 11. Danciu I, Cowan JD, Basford M, Wang X, Saip A, Osgood S, et al. Secondary use of clinical  
325 data: The Vanderbilt approach. *J Biomed Inform*. 2014;52:28–35.
- 326 12. Kaiser J. NIH’s 1-million-volunteer precision medicine study announces first pilot projects.  
327 *Science* [Internet]. 2016 [cited 2018 Nov 15]; Available from:  
328 [https://www.sciencemag.org/news/2016/02/nih-s-1-million-volunteer-precision-medicine-study-](https://www.sciencemag.org/news/2016/02/nih-s-1-million-volunteer-precision-medicine-study-announces-first-pilot-projects)  
329 [announces-first-pilot-projects](https://www.sciencemag.org/news/2016/02/nih-s-1-million-volunteer-precision-medicine-study-announces-first-pilot-projects)
- 330 13. Euesden J, Lewis CM, O’Reilly PF. PRSice: Polygenic Risk Score software. *Bioinformatics*.  
331 2015;31:1466–8.
- 332 14. Choi SW, Mak TSH, O’Reilly P. A guide to performing Polygenic Risk Score analyses.  
333 *bioRxiv*. 2018;416545.
- 334 15. Mak TSH, Porsch RM, Choi SW, Zhou X, Sham PC. Polygenic scores via penalized  
335 regression on summary statistics. *Genet Epidemiol*. 2017;41:469–80.
- 336 16. Vilhjálmsson BJ, Yang J, Finucane HK, Gusev A, Lindström S, Ripke S, et al. Modeling  
337 Linkage Disequilibrium Increases Accuracy of Polygenic Risk Scores. *Am J Hum Genet*.  
338 2015;97:576–92.
- 339 17. Chang CC, Chow CC, Tellier LC, Vattikuti S, Purcell SM, Lee JJ. Second-generation  
340 PLINK: rising to the challenge of larger and richer datasets. *GigaScience*. 2015;4:7.

- 341 18. Wray NR, Lee SH, Mehta D, Vinkhuyzen AAE, Dudbridge F, Middeldorp CM. Research  
342 review: Polygenic methods and their application to psychiatric traits. *J Child Psychol Psychiatry*.  
343 2014;55:1068–87.
- 344 19. Li Y, Willer C, Sanna S, Abecasis G. Genotype Imputation. *Annu Rev Genomics Hum*  
345 *Genet*. 2009;10:387–406.
- 346 20. Wood AR, Esko T, Yang J, Vedantam S, Pers TH, Gustafsson S, et al. Defining the role of  
347 common variation in the genomic and biological architecture of adult human height. *Nat Genet*.  
348 2014;46:1173–86.
- 349 21. Locke AE, Kahali B, Berndt SI, Justice AE, Pers TH, Day FR, et al. Genetic studies of body  
350 mass index yield new insights for obesity biology. *Nature*. 2015;518:197–206.
- 351 22. North BV, Curtis D, Sham PC. A Note on the Calculation of Empirical P Values from Monte  
352 Carlo Procedures. *Am J Hum Genet*. 2002;71:439–41.
- 353 23. Hagenaars SP, Harris SE, Davies G, Hill WD, Liewald DCM, Ritchie SJ, et al. Shared  
354 genetic aetiology between cognitive functions and physical and mental health in UK Biobank  
355 (N=112 151) and 24 GWAS consortia. *Mol Psychiatry*. 2016;21:1624–32.
- 356 24. Allegrini A, Selzam S, Rimfeld K, Stumm S von, Pingault J-B, Plomin R. Genomic  
357 prediction of cognitive traits in childhood and adolescence. *bioRxiv*. 2018;418210.
- 358 25. Ge T, Chen C-Y, Ni Y, Feng Y-CA, Smoller JW. Polygenic Prediction via Bayesian  
359 Regression and Continuous Shrinkage Priors. *bioRxiv*. 2018;416859.
- 360 26. Janssens ACJW, Joyner MJ. Polygenic Risk Scores That Predict Common Diseases Using  
361 Millions of Single Nucleotide Polymorphisms: Is More, Better? *Clin Chem*.  
362 2019;clinchem.2018.296103.
- 363 27. Duncan L, Shen H, Gelaye B, Ressler K, Feldman M, Peterson R, et al. Analysis of  
364 Polygenic Score Usage and Performance across Diverse Human Populations. *bioRxiv*.  
365 2018;398396.
- 366 28. Márquez- Luna C, Loh P-R, Price AL. Multiethnic polygenic risk scores improve risk  
367 prediction in diverse populations. *Genet Epidemiol*. 2017;41:811–23.
- 368 29. Martin AR, Gignoux CR, Walters RK, Wojcik GL, Neale BM, Gravel S, et al. Human  
369 Demographic History Impacts Genetic Risk Prediction across Diverse Populations. *Am J Hum*  
370 *Genet*. 2017;100:635–49.
- 371 30. Choi SW; O'Reilly PF: Supporting data for "PRSice-2: Polygenic Risk Score Software for  
372 Large-Scale Data" *GigaScience Database*. 2019. <http://dx.doi.org/10.5524/100591>.  
373

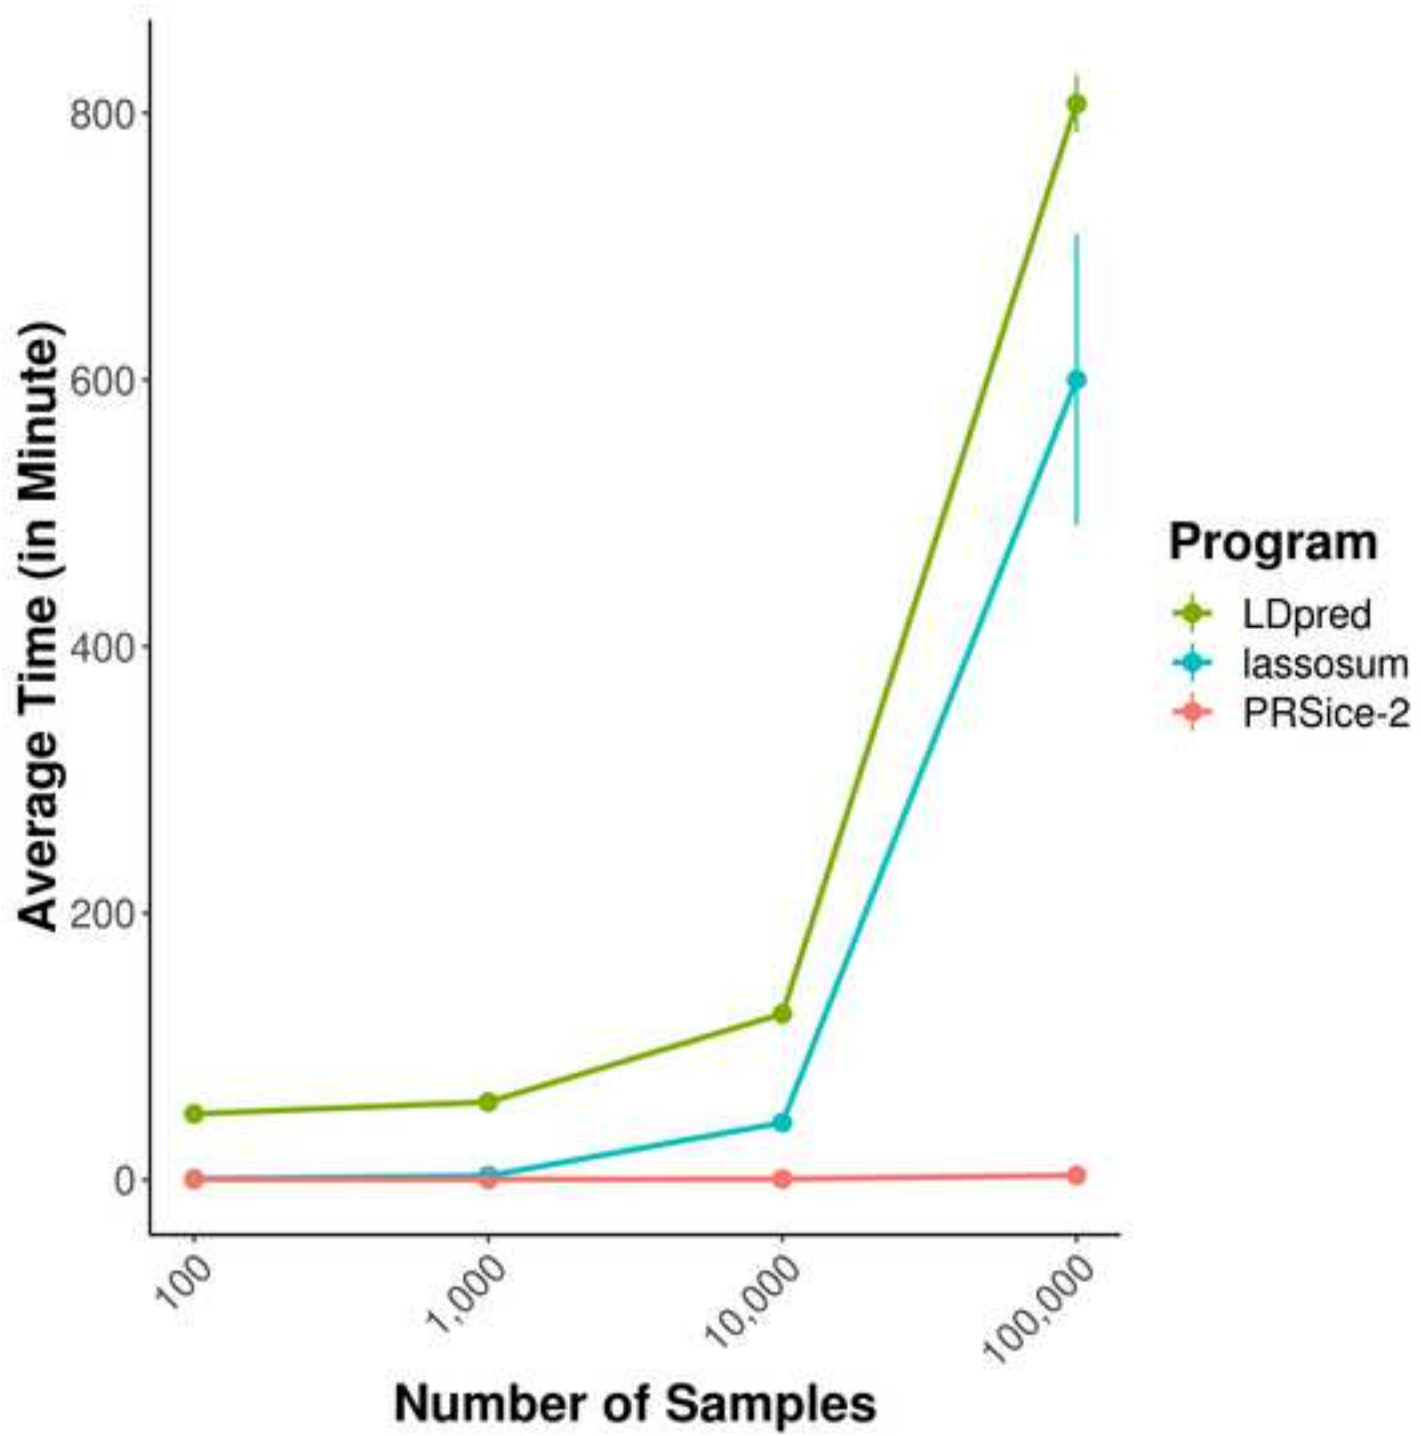

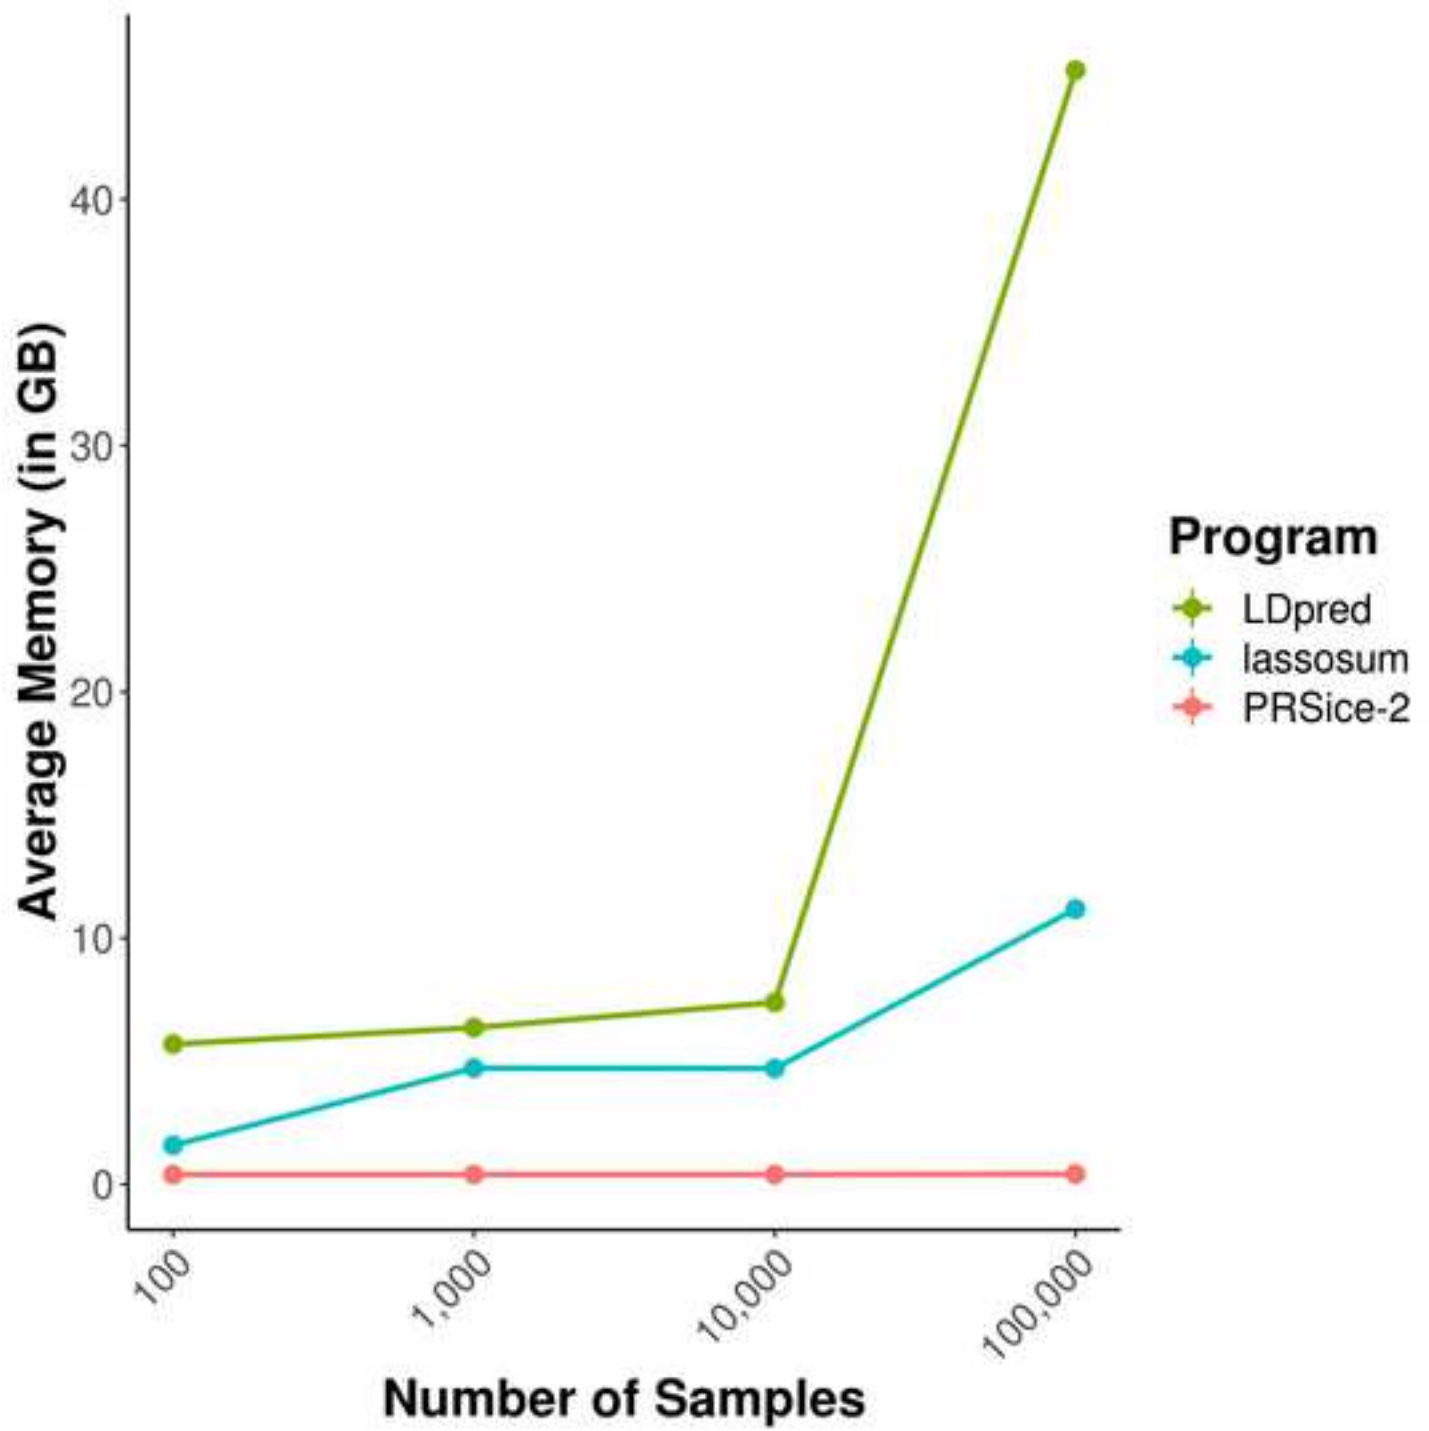

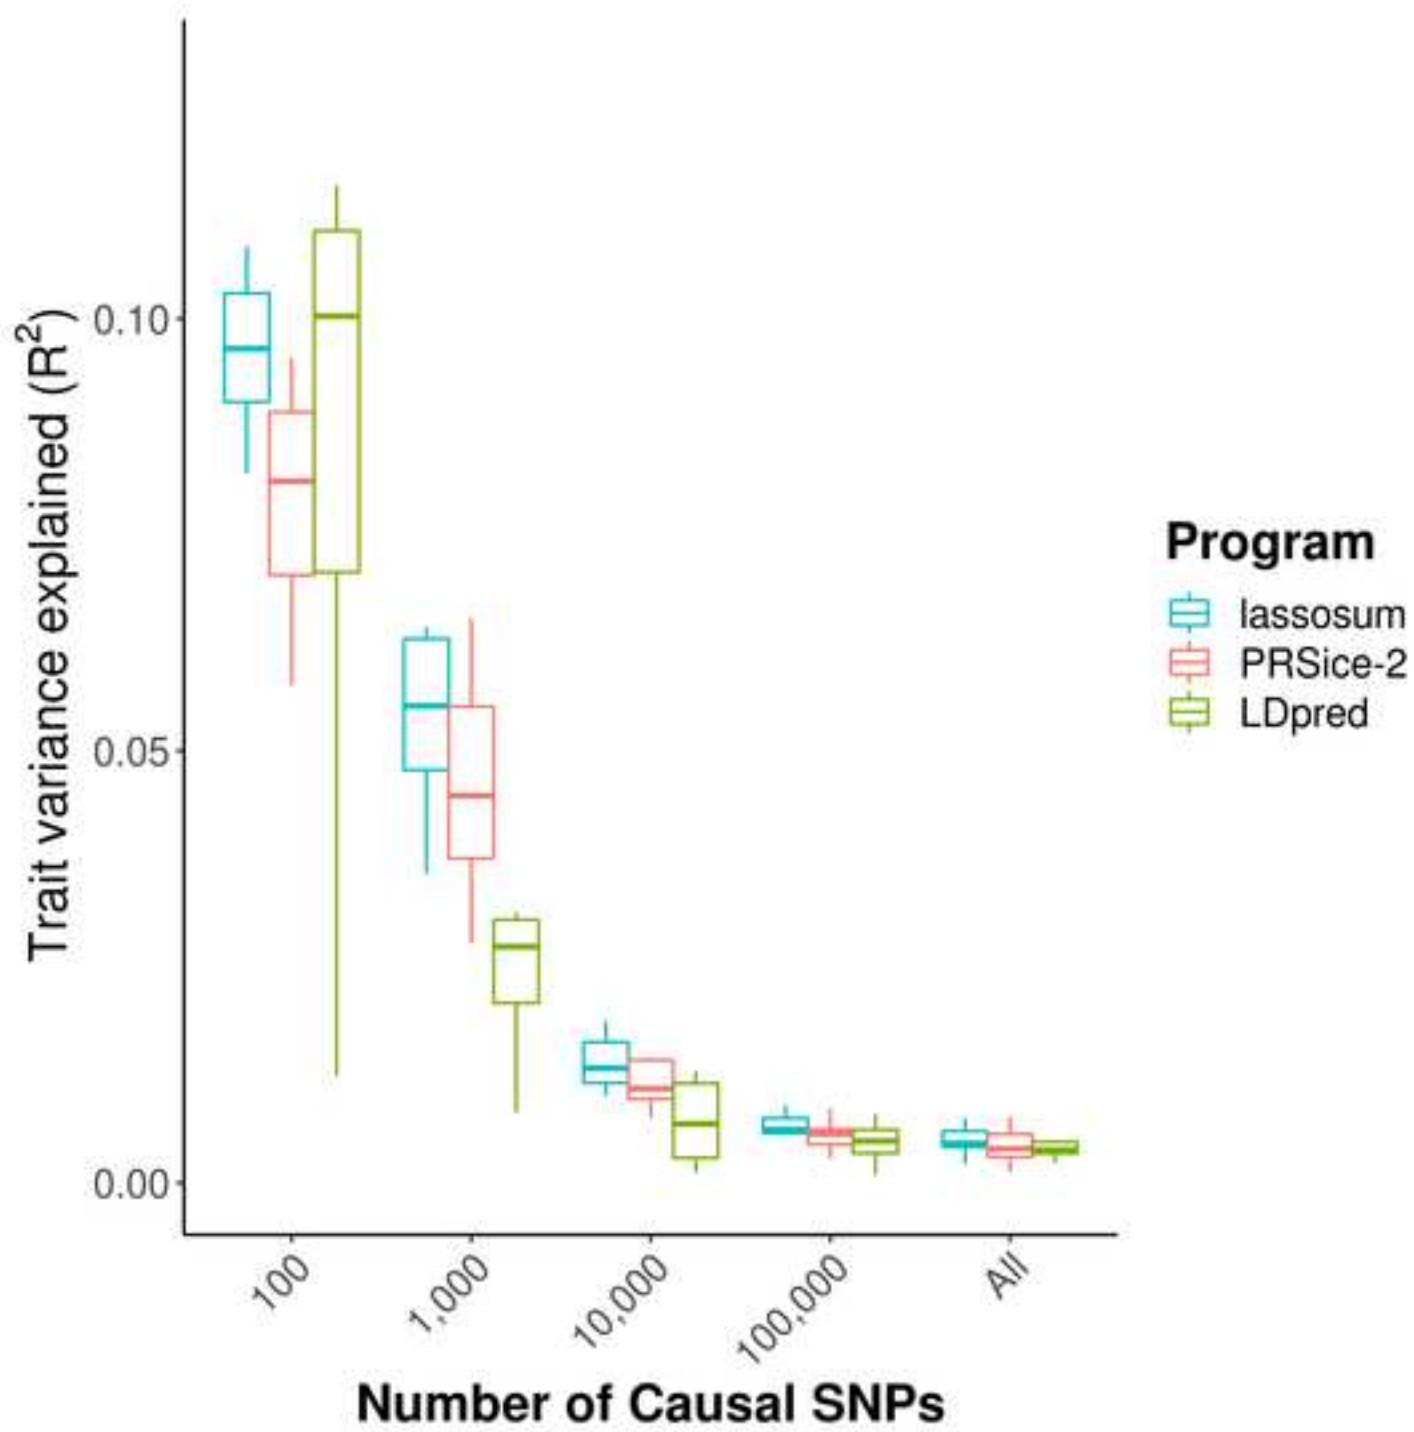

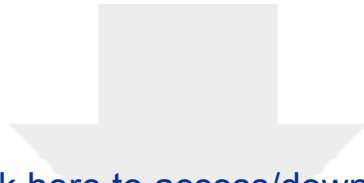

[Click here to access/download](#)

**Supplementary Material**

20190604-PRSize2 Supplementary.docx

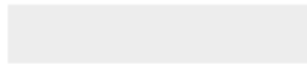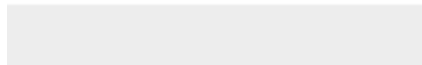

MRC Social, Genetic &  
Developmental Psychiatry Centre  
Director Francesca Happé

16 De Crespigny Park  
Denmark Hill  
London SE5 8AF

Dr Shing Wan Choi  
Email: [shing\\_wan.choi@kcl.ac.uk](mailto:shing_wan.choi@kcl.ac.uk)  
Telephone: +44 (0)7729246486

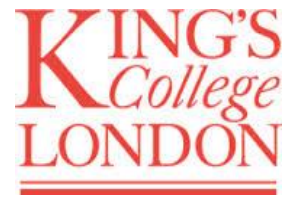

***PRSice-2: Polygenic Risk Score Analysis Software for Biobank-Scale Data*** (For submission as a Technical Note)

11<sup>th</sup> June 2019

Dear Editor,

Thank you for your patience. After the previous exchange, we agreed with reviewer 2 that the poor performance of LDpred seemed peculiar. As a result of that, we contacted the first author of LDpred, Dr Bjarni Vilhjalmsón. He informed us that LDpred can become sensitive to small deviations in LD estimates when there are large sample sizes in application to a trait with high heritability. We also noted that there is a new version of LDpred (v1.0.6) now available. Repeating our analyses using a smaller base sample size of 50000, and using the latest version of LDpred, we noted that the performance of LDpred substantially improved. As a result of this, we repeated our entire analyses using the latest versions of PRSice-2 and LDpred and have updated our results accordingly. The overall results remain qualitatively unchanged: PRSice-2 is still markedly the fastest PRS program (more so than previously) and it has comparable power to lassosum and LDpred, with predictive power higher than LDpred and lower than lassosum. Overall, we believe that our final manuscript is much improved and also up-to-date to the very latest versions of all programs.

Thank you very much for your assistance and patience with this, and for selecting our manuscript for publication in Gigascience. In a minor point, we note that we have changed the title to state 'biobank-scale data' rather than 'large-scale data' as we felt that this was more appropriate (and also engaging) in the context, but we understand if it is too late for such a change.

Shing Wan Choi (cc'ed Paul F. O'Reilly)
